# Supplementary material for: Genetic Variants in the Bone Morphogenic Protein Gene Family Modify the Association between Residential Exposure to Traffic and Peripheral Arterial Disease
Source: PLOS journal article supplement (doi:10.1371/journal.pone.0152670), 2016-04-15

(a) EA BMP8A LD

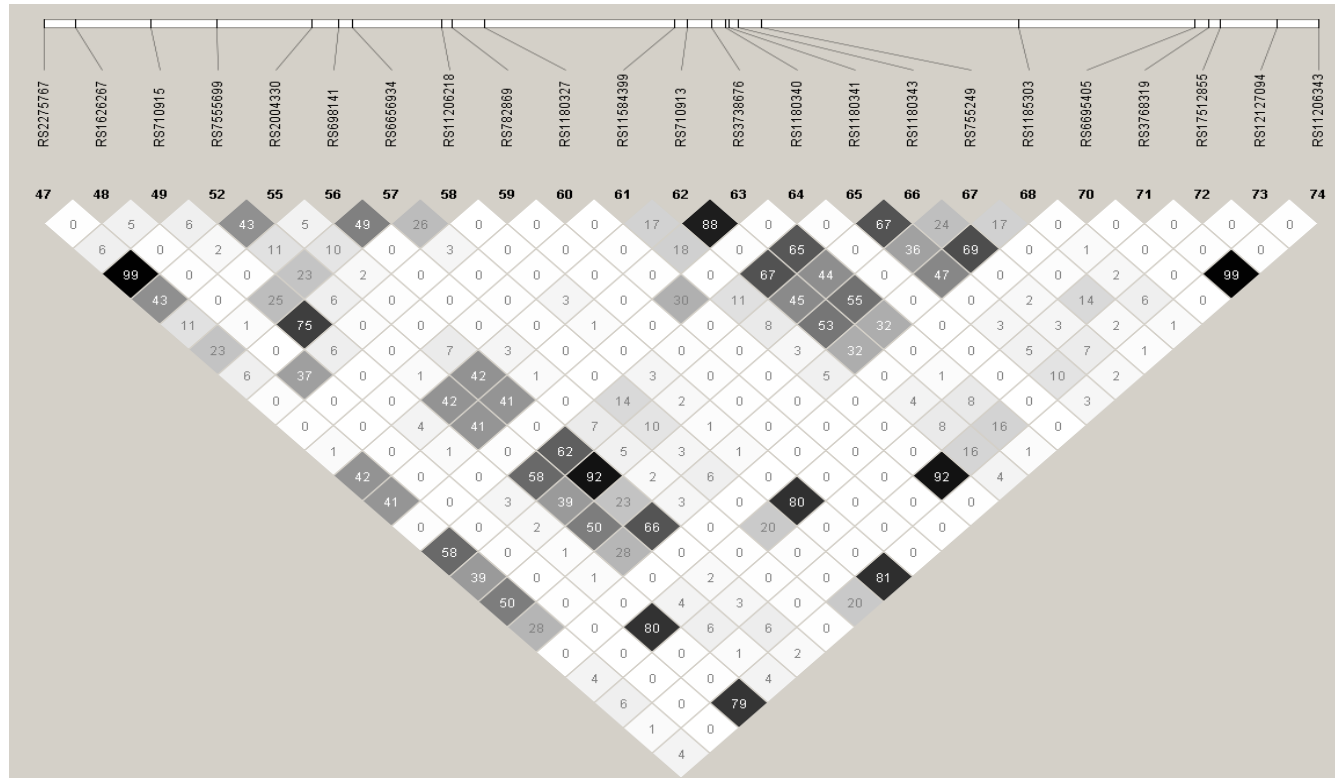

(b) AA BMP8A LD

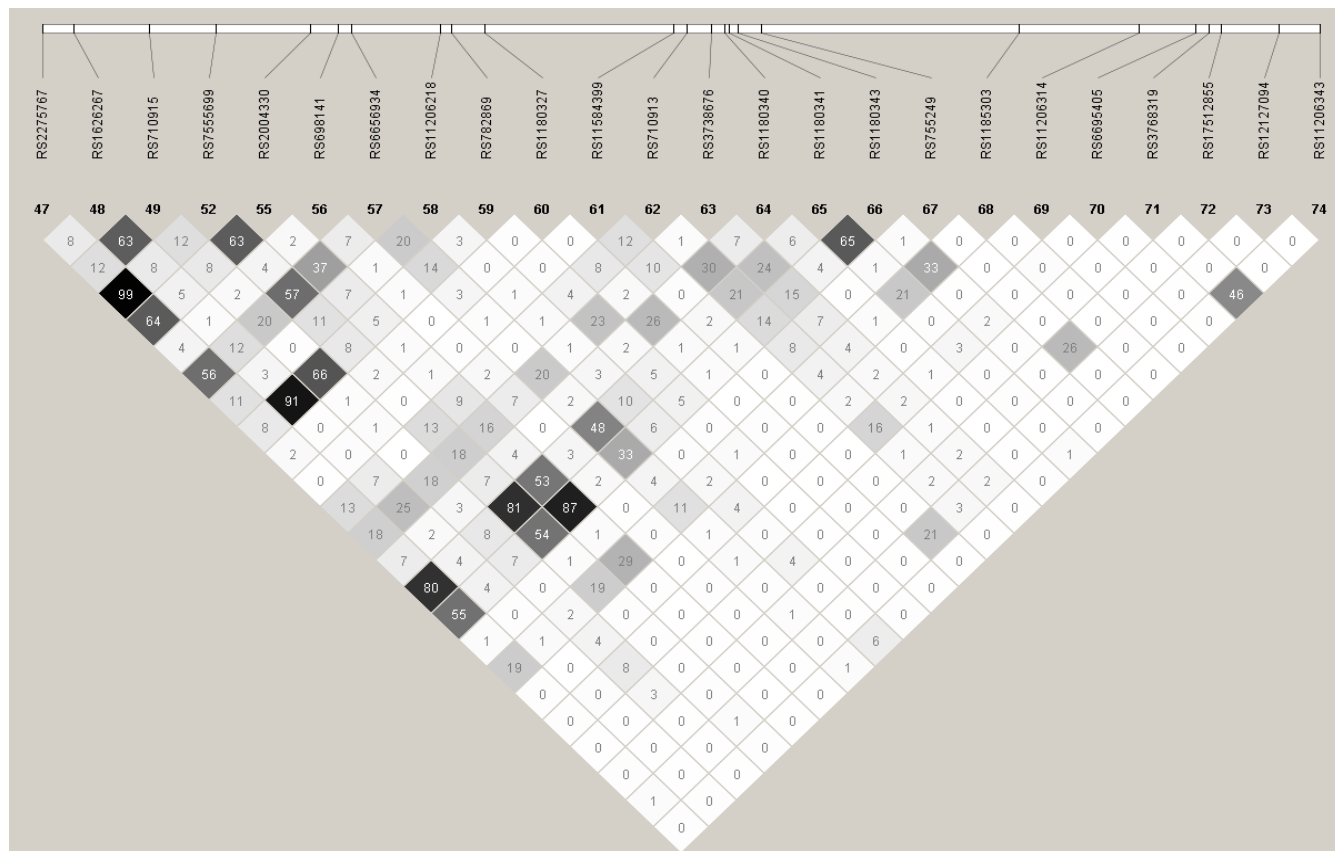

Supplement: S1 (10.1371/journal.pone.0152670.s001) [file journal.pone.0152670.s001.PDF › journal.pone.0152670.s001.PDF]
