# Supplementary material for: Genetic Variants in the Bone Morphogenic Protein Gene Family Modify the Association between Residential Exposure to Traffic and Peripheral Arterial Disease
Source: PLOS journal article supplement (doi:10.1371/journal.pone.0152670), 2016-04-15

S10 Fig

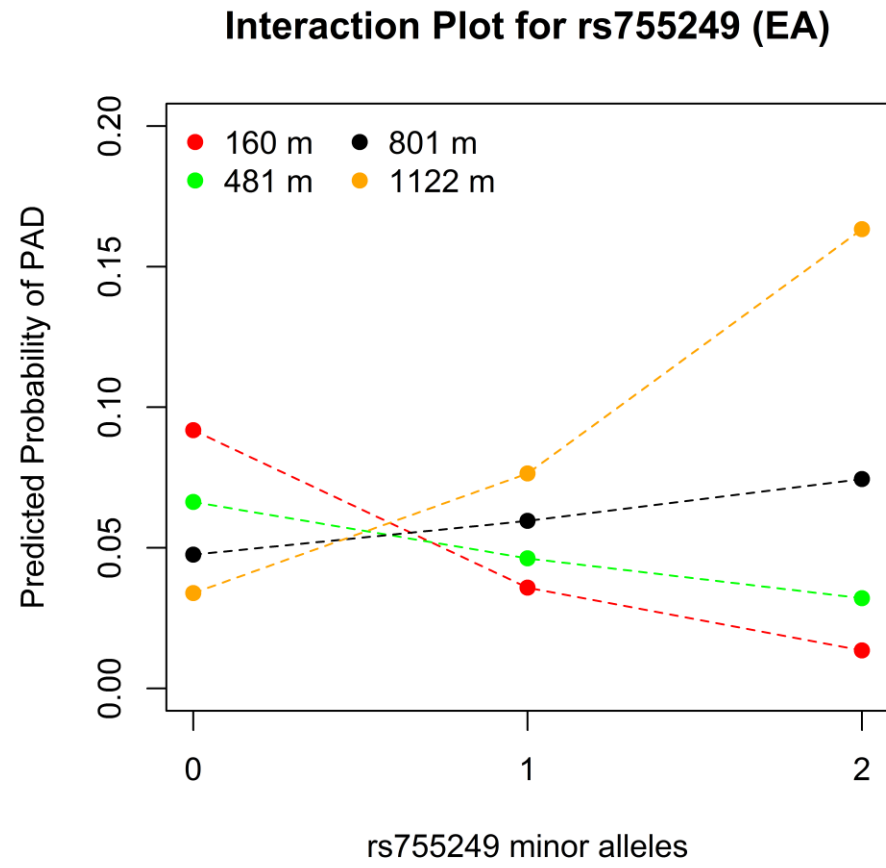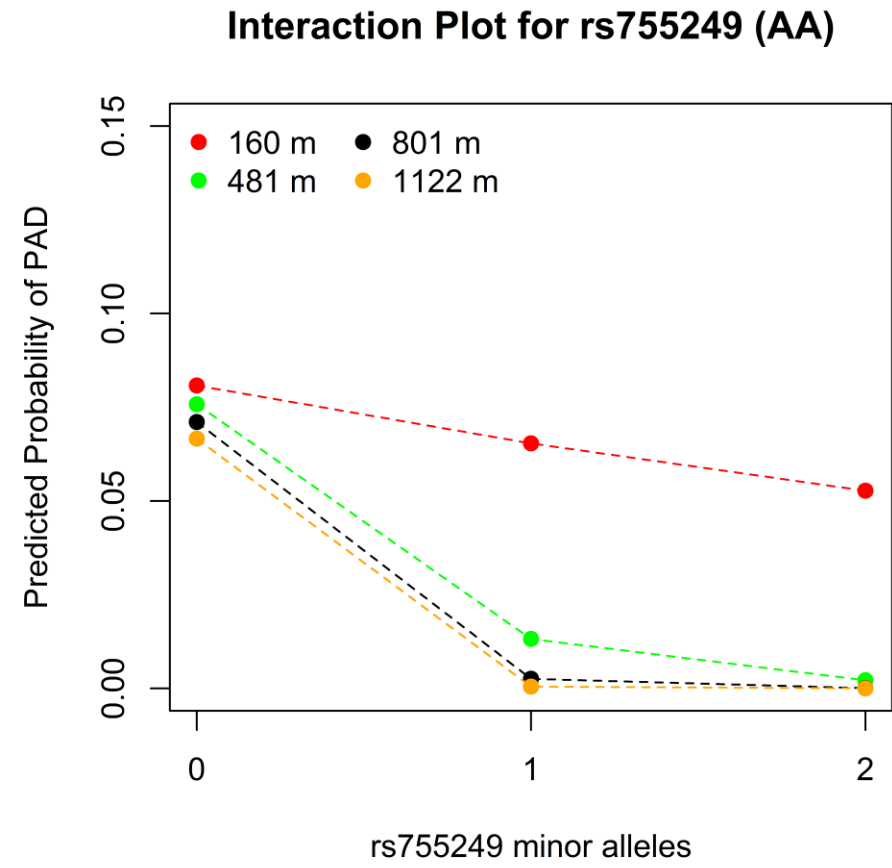

Supplement: S2 (10.1371/journal.pone.0152670.s002) [file journal.pone.0152670.s002.PDF › journal.pone.0152670.s002.PDF]
