# Supplementary material for: Genetic Variants in the Bone Morphogenic Protein Gene Family Modify the Association between Residential Exposure to Traffic and Peripheral Arterial Disease
Source: PLOS journal article supplement (doi:10.1371/journal.pone.0152670), 2016-04-15

S3 Fig

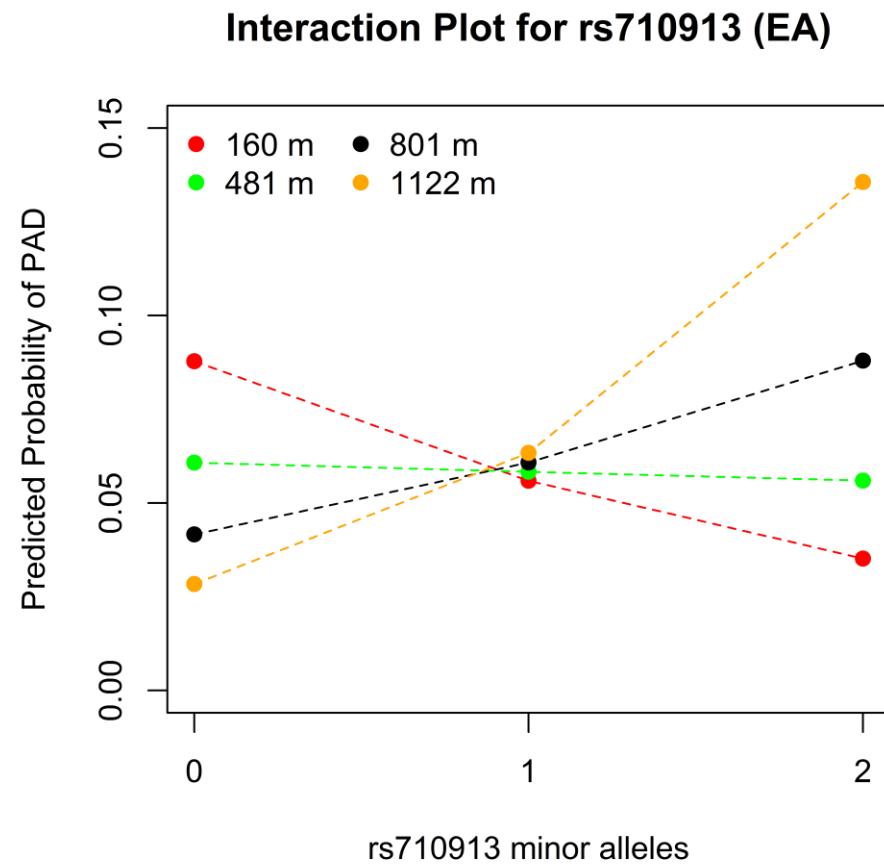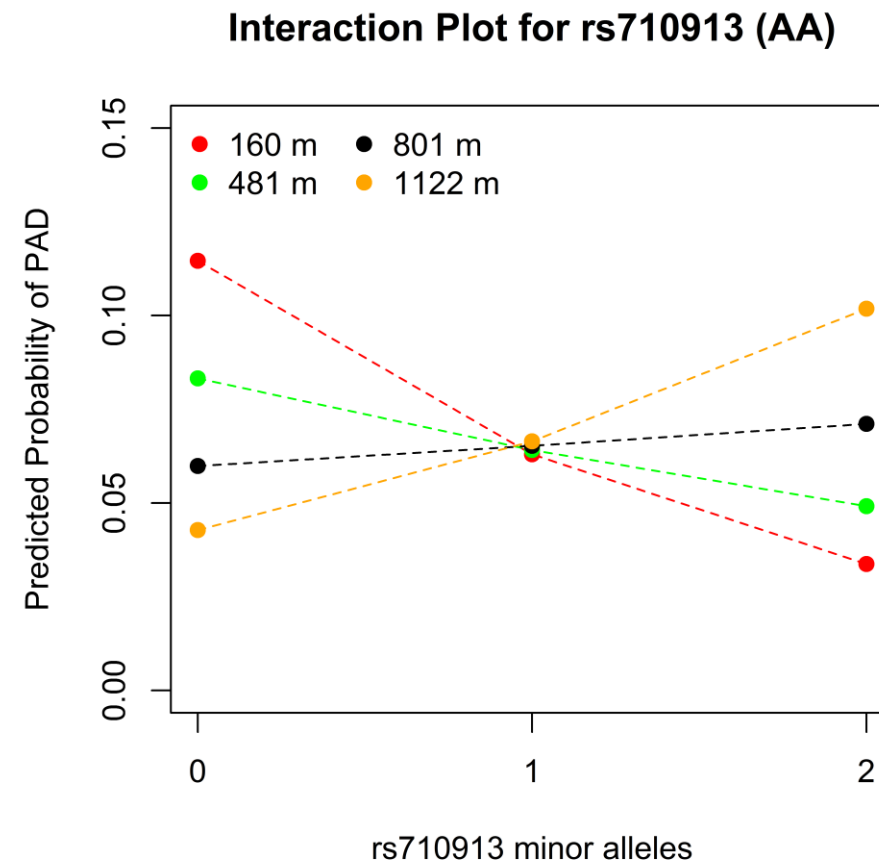

Supplement: S3 (10.1371/journal.pone.0152670.s003) [file journal.pone.0152670.s003.PDF › journal.pone.0152670.s003.PDF]
