# Supplementary material for: Genetic Variants in the Bone Morphogenic Protein Gene Family Modify the Association between Residential Exposure to Traffic and Peripheral Arterial Disease
Source: PLOS journal article supplement (doi:10.1371/journal.pone.0152670), 2016-04-15
Supplement: S4 (10.1371/journal.pone.0152670.s004) [file journal.pone.0152670.s004.PDF › journal.pone.0152670.s004.PDF]

Supplemental Table 1: Clinical covariates separated by PAD status. P-values assessed via ANOVA for continuous covariates (Age and BMI), and via a Chi-squared test for all binary outcomes: Sex, Race, Smoking, Diabetes, Hypertension, Dyslipidemia.

| Table 1                         |                |                     |                         |         |
|---------------------------------|----------------|---------------------|-------------------------|---------|
| 1a. CATHGEN Clinical Covariates | All (N = 9334) | PAD cases (N = 709) | PAD Controls (N = 8625) | P       |
| Age (SD)                        | 60.8 (12)      | 65.5 (10.2)         | 60.4 (12.1)             | < 0.001 |
| BMI (SD)                        | 30 (7.19)      | 29.1 (6.61)         | 30.1 (7.23)             | < 0.001 |
| Sex (% Female)                  | 3531 (37.8)    | 225 (31.7)          | 3306 (38.3)             | < 0.001 |
| Race (% Caucasian)              | 6981 (74.8)    | 552 (77.9)          | 6429 (74.5)             | < 0.001 |
| Smoking (% Ever Smoke)          | 4439 (47.6)    | 503 (70.9)          | 3936 (45.6)             | < 0.001 |
| Diabetes (% Yes)                | 2640 (28.3)    | 294 (41.5)          | 2346 (27.2)             | < 0.001 |
| Hypertension (% Yes)            | 6277 (67.2)    | 574 (81)            | 5703 (66.1)             | < 0.001 |
| Dyslipidemia (% Yes)            | 5557 (59.5)    | 542 (76.4)          | 5015 (58.1)             | < 0.001 |
|                                 |                |                     |                         |         |
| 1b. Air Pollution Study Cohort  | All (N = 6066) | PAD cases (N = 478) | PAD Controls (N = 5588) | P       |
| Age (SD)                        | 61 (12)        | 64.7 (10.7)         | 60.7 (12.1)             | < 0.001 |
| BMI (SD)                        | 30.1 (7.29)    | 29.3 (7.26)         | 30.2 (7.29)             | 0.010   |
| Sex (% Female)                  | 2333 (38.5)    | 139 (29.1)          | 2194 (39.3)             | < 0.001 |
| Race (% Caucasian)              | 4703 (77.5)    | 380 (79.5)          | 4323 (77.4)             | 0.31    |
| Smoking (% Ever Smoke)          | 2946 (48.6)    | 352 (73.6)          | 2594 (46.4)             | < 0.001 |
| Diabetes (% Yes)                | 1749 (28.8)    | 196 (41)            | 1553 (27.8)             | < 0.001 |
| Hypertension (% Yes)            | 4150 (68.4)    | 398 (83.3)          | 3752 (67.1)             | < 0.001 |
| Dyslipidemia (% Yes)            | 3659 (60.3)    | 373 (78)            | 3286 (58.8)             | < 0.001 |
|                                 |                |                     |                         |         |
| 1c. GWIS Cohort                 | All (N = 2177) | PAD cases (N = 138) | PAD Controls (N = 2039) | P       |
| Age (SD)                        | 60 (12)        | 65.2 (10.4)         | 59.6 (12)               | < 0.001 |
| BMI (SD)                        | 30.4 (7.34)    | 29.9 (7.29)         | 30.4 (7.35)             | 0.41    |
| Sex (% Female)                  | 936 (43)       | 49 (35.5)           | 887 (43.5)              | 0.080   |
| Race (% Caucasian)              | 1623 (74.6)    | 104 (75.4)          | 1519 (74.5)             | 0.90    |
| Smoking (% Ever Smoke)          | 1051 (48.3)    | 97 (70.3)           | 954 (46.8)              | < 0.001 |
| Diabetes (% Yes)                | 665 (30.5)     | 65 (47.1)           | 600 (29.4)              | < 0.001 |
| Hypertension (% Yes)            | 1491 (68.5)    | 115 (83.3)          | 1376 (67.5)             | < 0.001 |
| Dyslipidemia (% Yes)            | 1286 (59.1)    | 109 (79)            | 1177 (57.7)             | < 0.001 |
