# Supplementary material for: Genetic Variants in the Bone Morphogenic Protein Gene Family Modify the Association between Residential Exposure to Traffic and Peripheral Arterial Disease
Source: PLOS journal article supplement (doi:10.1371/journal.pone.0152670), 2016-04-15
Supplement: S5 (10.1371/journal.pone.0152670.s005) [file journal.pone.0152670.s005.PDF › journal.pone.0152670.s005.PDF]

Supplemental Table 2a. EA GWIS Full Model Results

| <b>SNP</b> | <b>Odds Ratio</b> | <b>SE</b> | <b>P</b> |  |
|------------|-------------------|-----------|----------|--|
| RS755249   | 3.27              | 0.24      | 2.86E-07 |  |
| RS9409787  | 4.53              | 0.33      | 8.22E-07 |  |
| RS17513135 | 3.23              | 0.25      | 9.06E-07 |  |
| RS12651722 | 2.84              | 0.23      | 2.05E-06 |  |
| RS10063408 | 2.90              | 0.23      | 2.12E-06 |  |
| RS3738676  | 2.85              | 0.23      | 2.25E-06 |  |
| RS6879255  | 2.81              | 0.23      | 2.56E-06 |  |
| RS2431268  | 2.81              | 0.23      | 3.19E-06 |  |
| RS16890431 | 9.20              | 0.62      | 3.28E-06 |  |
| RS4904089  | 2.95              | 0.25      | 3.56E-06 |  |
| RS2185458  | 2.95              | 0.25      | 3.69E-06 |  |
| RS7539279  | 2.76              | 0.23      | 4.05E-06 |  |
| RS2479587  | 7.22              | 0.49      | 4.25E-06 |  |
| RS7520271  | 2.76              | 0.23      | 4.27E-06 |  |
| RS2255486  | 495               | 2.91      | 4.79E-06 |  |
| RS2653622  | 8.14              | 0.59      | 8.91E-06 |  |
| RS1317681  | 3.35              | 0.30      | 1.10E-05 |  |
| RS12195741 | 2.52              | 0.22      | 1.10E-05 |  |
| RS10491083 | 5.18              | 0.45      | 1.14E-05 |  |
| RS11206378 | 2.59              | 0.22      | 1.32E-05 |  |
| RS9548897  | 2.69              | 0.23      | 1.41E-05 |  |
| RS6873809  | 2.50              | 0.22      | 1.44E-05 |  |
| RS2893113  | 7.97              | 0.55      | 1.48E-05 |  |
| RS4660214  | 2.83              | 0.25      | 1.48E-05 |  |
| RS2282231  | 2.82              | 0.25      | 1.55E-05 |  |
| RS7448872  | 2.49              | 0.22      | 1.56E-05 |  |
| RS16826069 | 2.80              | 0.25      | 1.56E-05 |  |
| RS10050893 | 2.49              | 0.22      | 1.58E-05 |  |
| RS2123811  | 2.49              | 0.22      | 1.60E-05 |  |
| RS398293   | 0.37              | 0.23      | 1.62E-05 |  |
| RS12883063 | 2.81              | 0.25      | 1.63E-05 |  |
| RS2296173  | 2.82              | 0.25      | 1.66E-05 |  |
| RS2296172  | 2.82              | 0.25      | 1.66E-05 |  |
| RS3768302  | 2.82              | 0.25      | 1.66E-05 |  |
| RS2746183  | 3.20              | 0.29      | 1.69E-05 |  |
| RS12434963 | 0.38              | 0.23      | 1.73E-05 |  |
| RS3899445  | 2.53              | 0.22      | 1.78E-05 |  |
| RS16826093 | 2.81              | 0.25      | 1.79E-05 |  |
| RS460911   | 2.73              | 0.24      | 1.88E-05 |  |
| RS6594781  | 2.44              | 0.21      | 1.89E-05 |  |
| RS9395234  | 0.28              | 0.31      | 2.00E-05 |  |
| RS41290700 | 21182             | 11.16     | 2.03E-05 |  |
| RS5992403  | 2.45              | 0.21      | 2.03E-05 |  |
| RS6045173  | 0.41              | 0.21      | 2.07E-05 |  |
| RS973148   | 2.60              | 0.23      | 2.28E-05 |  |
| RS10437580 | 0.39              | 0.23      | 2.32E-05 |  |
| RS10978620 | 2.77              | 0.25      | 2.33E-05 |  |
| RS4340770  | 0.40              | 0.22      | 2.34E-05 |  |
| RS12030495 | 2.48              | 0.22      | 2.53E-05 |  |
| RS7863929  | 2.75              | 0.25      | 2.62E-05 |  |

|            |      |      |          |
|------------|------|------|----------|
| RS11202287 | 4.10 | 0.36 | 2.67E-05 |
| RS6780357  | 6.76 | 0.49 | 2.72E-05 |
| RS4962067  | 4.12 | 0.37 | 2.73E-05 |
| RS10983084 | 0.38 | 0.23 | 2.85E-05 |
| RS11202282 | 3.59 | 0.32 | 2.91E-05 |
| RS11717532 | 6.72 | 0.49 | 2.96E-05 |
| RS11716183 | 6.72 | 0.49 | 2.96E-05 |
| RS1411500  | 17.2 | 0.90 | 3.02E-05 |
| RS17109801 | 2.76 | 0.25 | 3.06E-05 |
| RS1867114  | 3.13 | 0.29 | 3.14E-05 |
| RS1622879  | 0.41 | 0.22 | 3.18E-05 |
| RS719793   | 0.36 | 0.25 | 3.18E-05 |
| RS11966101 | 8.59 | 0.63 | 3.24E-05 |
| RS7047726  | 3.98 | 0.36 | 3.30E-05 |
| RS5746742  | 2.38 | 0.21 | 3.32E-05 |
| RS6712892  | 0.26 | 0.34 | 3.36E-05 |
| RS1180320  | 0.41 | 0.22 | 3.40E-05 |
| RS6912824  | 5.53 | 0.49 | 3.48E-05 |
| RS6570048  | 0.40 | 0.22 | 3.52E-05 |
| RS7686844  | 2.34 | 0.21 | 3.71E-05 |
| RS2255357  | 334  | 2.90 | 3.72E-05 |
| RS6838749  | 2.34 | 0.21 | 3.80E-05 |
| RS1555235  | 0.37 | 0.24 | 3.85E-05 |
| RS1161240  | 0.42 | 0.22 | 4.10E-05 |
| RS7747909  | 2.61 | 0.24 | 4.16E-05 |
| RS2269722  | 0.43 | 0.21 | 4.19E-05 |
| RS11733284 | 2.44 | 0.22 | 4.22E-05 |
| RS3850947  | 2.85 | 0.26 | 4.22E-05 |
| RS643099   | 3.79 | 0.36 | 4.28E-05 |
| RS7780899  | 2.80 | 0.26 | 4.60E-05 |
| RS7448169  | 2.35 | 0.21 | 4.62E-05 |
| RS2129209  | 0.19 | 0.43 | 4.64E-05 |
| RS4415146  | 2.46 | 0.22 | 4.69E-05 |
| RS6893716  | 215  | 2.01 | 4.78E-05 |
| RS10934751 | 0.39 | 0.23 | 4.98E-05 |
| RS7554206  | 2.50 | 0.23 | 5.04E-05 |
| RS10900675 | 2.41 | 0.22 | 5.06E-05 |
| GA022530   | 2.63 | 0.25 | 5.34E-05 |
| RS458975   | 2.56 | 0.24 | 5.39E-05 |
| RS1610062  | 2.54 | 0.23 | 5.49E-05 |
| RS710913   | 2.41 | 0.22 | 5.52E-05 |
| RS6892152  | 2.39 | 0.22 | 5.54E-05 |
| RS587404   | 2.48 | 0.23 | 5.59E-05 |
| RS2283650  | 0.43 | 0.21 | 5.72E-05 |
| RS10788933 | 2.53 | 0.24 | 5.72E-05 |
| RS16890409 | 2.78 | 0.27 | 5.87E-05 |
| RS12082516 | 0.30 | 0.31 | 5.87E-05 |
| RS5992413  | 0.43 | 0.21 | 5.91E-05 |
| RS927987   | 0.38 | 0.25 | 6.02E-05 |
| RS1044176  | 5.58 | 0.46 | 6.02E-05 |
| RS1029845  | 2.46 | 0.23 | 6.07E-05 |
| RS681634   | 2.37 | 0.22 | 6.08E-05 |

|            |      |      |          |
|------------|------|------|----------|
| RS4320303  | 2.32 | 0.21 | 6.18E-05 |
| RS6594760  | 2.32 | 0.21 | 6.22E-05 |
| RS2168002  | 2.32 | 0.21 | 6.22E-05 |
| RS12623026 | 2.42 | 0.22 | 6.23E-05 |
| RS16856197 | 13.7 | 0.78 | 6.29E-05 |
| RS6440276  | 13.7 | 0.78 | 6.29E-05 |
| RS2369754  | 2.32 | 0.21 | 6.31E-05 |
| RS6894718  | 2.32 | 0.21 | 6.33E-05 |
| RS3850905  | 2.37 | 0.22 | 6.36E-05 |
| RS2275187  | 2.48 | 0.23 | 6.37E-05 |
| RS1565078  | 2.42 | 0.22 | 6.42E-05 |
| RS7576895  | 2.42 | 0.22 | 6.43E-05 |
| RS6890382  | 2.37 | 0.22 | 6.45E-05 |
| RS2275188  | 2.47 | 0.23 | 6.51E-05 |
| RS6513310  | 3.76 | 0.39 | 6.66E-05 |
| RS4134982  | 16.1 | 0.87 | 6.78E-05 |
| RS7186248  | 0.40 | 0.23 | 6.80E-05 |
| RS2732078  | 2.38 | 0.22 | 6.81E-05 |
| RS13374459 | 2.30 | 0.21 | 6.92E-05 |
| RS2866622  | 2.46 | 0.23 | 6.94E-05 |
| RS10484879 | 2.55 | 0.24 | 6.98E-05 |
| RS12552226 | 2.46 | 0.23 | 6.99E-05 |
| RS4716100  | 0.39 | 0.24 | 7.11E-05 |
| RS4736297  | 0.40 | 0.23 | 7.14E-05 |
| RS2699502  | 0.41 | 0.23 | 7.52E-05 |
| RS10493087 | 2.45 | 0.23 | 7.62E-05 |
| RS1208217  | 0.41 | 0.23 | 7.68E-05 |
| RS1384936  | 2.37 | 0.22 | 7.71E-05 |
| RS10129421 | 2.46 | 0.24 | 7.75E-05 |
| RS2111362  | 2.39 | 0.23 | 7.77E-05 |
| RS17250154 | 0.24 | 0.38 | 7.79E-05 |
| RS11803971 | 6.68 | 0.54 | 7.90E-05 |
| RS8003722  | 3.10 | 0.30 | 7.92E-05 |
| RS1080382  | 2.31 | 0.22 | 7.99E-05 |
| RS15820    | 2.86 | 0.28 | 8.08E-05 |
| RS1346901  | 2.29 | 0.21 | 8.10E-05 |
| RS337520   | 2.61 | 0.25 | 8.25E-05 |
| RS540599   | 2.26 | 0.21 | 8.33E-05 |
| RS9466456  | 2.41 | 0.23 | 8.33E-05 |
| RS7523716  | 0.37 | 0.26 | 8.40E-05 |
| RS10741815 | 3.05 | 0.30 | 8.44E-05 |
| RS16837533 | 2.90 | 0.28 | 8.60E-05 |
| RS3118752  | 6.53 | 0.56 | 8.60E-05 |
| RS1487393  | 2.39 | 0.22 | 8.62E-05 |
| RS10788925 | 2.48 | 0.24 | 8.74E-05 |
| RS913462   | 2.37 | 0.22 | 8.89E-05 |
| RS321631   | 2.38 | 0.22 | 9.16E-05 |
| RS11852841 | 2.28 | 0.21 | 9.21E-05 |
| RS9546538  | 0.35 | 0.28 | 9.26E-05 |
| RS9531002  | 2.40 | 0.23 | 9.38E-05 |
| RS7933771  | 2.76 | 0.27 | 9.38E-05 |
| RS2041944  | 0.43 | 0.22 | 9.41E-05 |

|            |      |      |          |
|------------|------|------|----------|
| RS11794730 | 0.42 | 0.23 | 9.51E-05 |
| RS1887696  | 2.31 | 0.22 | 9.54E-05 |
| RS9593835  | 0.35 | 0.28 | 9.55E-05 |
| RS1867115  | 3.18 | 0.31 | 9.57E-05 |
| RS11806567 | 0.30 | 0.32 | 9.62E-05 |
| RS540458   | 0.29 | 0.33 | 9.63E-05 |
| RS4712500  | 4.05 | 0.39 | 9.78E-05 |
| RS11249617 | 2.65 | 0.26 | 9.80E-05 |
| RS12471388 | 2.67 | 0.27 | 9.84E-05 |
| RS6726083  | 2.67 | 0.27 | 9.87E-05 |

Supplemental Table 2b. AA GWIS Full Model Results

| <b>PROBE</b> | <b>ODDS_RATIO</b> | <b>SE</b> | <b>SCORE_PVAL</b> |
|--------------|-------------------|-----------|-------------------|
| RS9567406    | 58.4              | 2.40      | 1.44E-10          |
| RS1638665    | 827               | 10.65     | 3.23E-10          |
| RS13389599   | 23.2              | 1.49      | 4.25E-10          |
| RS634138     | 6.51              | 0.71      | 3.18E-09          |
| RS11039100   | 142               | 2.44      | 3.41E-09          |
| RS3755899    | 4529              | 11.86     | 7.51E-09          |
| RS7787478    | 9.38              | 0.67      | 1.57E-08          |
| RS11190074   | 7.64              | 0.70      | 1.63E-08          |
| RS6570628    | 26.9              | 0.86      | 2.25E-08          |
| RS17147740   | 10.5              | 0.66      | 2.84E-08          |
| RS9940555    | 7.57              | 0.54      | 3.39E-08          |
| RS2989314    | 11.8              | 0.71      | 5.09E-08          |
| RS750723     | 110               | 5.56      | 1.30E-07          |
| RS7860288    | 20.3              | 0.79      | 1.55E-07          |
| RS7022762    | 20.3              | 0.79      | 1.55E-07          |
| RS1735894    | 6.64              | 0.54      | 2.61E-07          |
| RS16965478   | 5.95              | 0.59      | 3.18E-07          |
| RS16855732   | 23.4              | 1.10      | 4.21E-07          |
| RS499832     | 6.21              | 0.49      | 4.77E-07          |
| RS2161719    | 5.59              | 0.43      | 5.88E-07          |
| RS8181880    | 27.5              | 1.04      | 6.00E-07          |
| RS10979314   | 271               | 4.25      | 6.60E-07          |
| RS11206019   | 37.0              | 1.42      | 6.75E-07          |
| RS12335314   | 5.43              | 0.73      | 7.29E-07          |
| RS9557207    | 27.4              | 1.04      | 7.30E-07          |
| RS10507495   | 16.8              | 0.90      | 7.53E-07          |
| RS17019537   | 8.57              | 0.80      | 9.80E-07          |
| RS3181225    | 4.78              | 0.59      | 1.11E-06          |
| RS28667979   | 21.5              | 0.81      | 1.11E-06          |
| RS11220138   | 28.3              | 1.17      | 1.12E-06          |
| RS4547347    | 124               | 2.32      | 1.15E-06          |
| RS17080395   | 5.66              | 0.57      | 1.21E-06          |
| RS11466653   | 119               | 5.56      | 1.25E-06          |
| RS10039526   | 13.4              | 0.77      | 1.26E-06          |
| RS11512640   | 27.6              | 1.17      | 1.31E-06          |
| RS9824246    | 6.16              | 0.55      | 1.33E-06          |
| RS11077983   | 4.97              | 0.48      | 1.38E-06          |
| RS9397365    | 17.4              | 0.76      | 1.39E-06          |
| RS11596966   | 67.0              | 1.48      | 1.40E-06          |
| RS11942139   | 20.2              | 1.03      | 1.56E-06          |

|            |      |      |          |
|------------|------|------|----------|
| RS2569254  | 4.70 | 0.59 | 1.65E-06 |
| RS9747201  | 4.88 | 0.47 | 2.12E-06 |
| RS242423   | 6.45 | 0.62 | 2.14E-06 |
| RS9451860  | 69.9 | 2.18 | 2.17E-06 |
| RS17037831 | 4.53 | 0.49 | 2.19E-06 |
| RS9784649  | 15.4 | 0.76 | 2.26E-06 |
| RS2073300  | 11.4 | 1.05 | 2.39E-06 |
| RS3806708  | 663  | 7.09 | 2.46E-06 |
| RS17130391 | 19.8 | 1.01 | 2.56E-06 |
| RS8121203  | 25.1 | 1.07 | 2.57E-06 |
| RS1539189  | 7.14 | 0.71 | 2.58E-06 |
| RS13147122 | 26.2 | 1.27 | 2.97E-06 |
| RS234284   | 16.7 | 0.79 | 3.33E-06 |
| RS11815171 | 4.69 | 0.52 | 3.48E-06 |
| RS1923894  | 11.3 | 0.66 | 3.56E-06 |
| RS4239020  | 4.76 | 0.48 | 3.58E-06 |
| RS17391705 | 61.3 | 1.51 | 3.59E-06 |
| RS6713543  | 47.4 | 1.55 | 3.70E-06 |
| RS10508774 | 12.0 | 0.71 | 3.72E-06 |
| RS1912124  | 105  | 1.96 | 3.80E-06 |
| RS9600550  | 34.2 | 1.13 | 4.22E-06 |
| RS2391106  | 4.63 | 0.52 | 4.42E-06 |
| RS10131663 | 4.37 | 0.41 | 4.42E-06 |
| RS6057126  | 6.44 | 0.51 | 4.48E-06 |
| RS13312727 | 24.5 | 1.17 | 4.64E-06 |
| RS7046999  | 6.41 | 0.66 | 4.71E-06 |
| RS1810494  | 42.9 | 4.51 | 4.73E-06 |
| RS16832236 | 16.3 | 1.00 | 4.82E-06 |
| RS660323   | 5.92 | 0.47 | 4.90E-06 |
| RS4757882  | 5.83 | 0.54 | 4.91E-06 |
| RS6698723  | 4.51 | 0.46 | 4.98E-06 |
| RS11622263 | 290  | 5.74 | 5.24E-06 |
| RS17143122 | 458  | 5.13 | 5.30E-06 |
| RS10510755 | 729  | 6.99 | 5.30E-06 |
| RS28382829 | 20.0 | 1.11 | 5.33E-06 |
| RS16941207 | 12.4 | 0.69 | 5.34E-06 |
| RS16892422 | 7.58 | 0.72 | 5.44E-06 |
| RS6748245  | 36.8 | 1.30 | 5.79E-06 |
| RS1392372  | 22.2 | 1.11 | 5.84E-06 |
| RS6142859  | 67.0 | 1.73 | 5.85E-06 |
| RS1786426  | 5.62 | 0.66 | 5.94E-06 |
| RS962073   | 5.60 | 0.59 | 6.00E-06 |
| RS4669572  | 5.47 | 0.51 | 6.02E-06 |
| RS4919017  | 11.2 | 0.69 | 6.08E-06 |
| RS10428206 | 24.0 | 1.27 | 6.30E-06 |
| RS17121644 | 17.0 | 0.99 | 6.39E-06 |
| RS2171475  | 20.9 | 0.95 | 6.52E-06 |
| RS9596720  | 28.3 | 1.10 | 6.68E-06 |
| RS1027896  | 17.8 | 1.15 | 6.72E-06 |
| RS11819158 | 8.03 | 0.85 | 6.80E-06 |
| RS10467515 | 28.5 | 1.10 | 6.80E-06 |
| RS7605628  | 12.0 | 0.69 | 6.92E-06 |

|            |      |      |          |
|------------|------|------|----------|
| RS919953   | 4.81 | 0.49 | 6.97E-06 |
| RS10046574 | 13.6 | 0.88 | 7.02E-06 |
| RS736088   | 61.0 | 1.73 | 7.38E-06 |
| RS10002434 | 17.7 | 1.07 | 7.65E-06 |
| RS10159109 | 31.1 | 1.41 | 7.84E-06 |
| RS6980740  | 3.91 | 0.46 | 7.87E-06 |
| RS12079836 | 4.41 | 0.45 | 8.15E-06 |
| RS10484876 | 35.8 | 1.31 | 8.18E-06 |
| RS10948567 | 26.6 | 1.25 | 8.49E-06 |
| RS2056389  | 9.97 | 0.65 | 8.51E-06 |
| RS13335729 | 4.43 | 0.41 | 8.62E-06 |
| RS3787309  | 6.20 | 0.46 | 8.80E-06 |
| RS12410212 | 31.9 | 1.42 | 8.89E-06 |
| RS17307778 | 14.9 | 1.05 | 9.07E-06 |
| RS4596377  | 34.9 | 1.36 | 9.12E-06 |
| RS497022   | 11.0 | 0.67 | 9.14E-06 |
| RS3858306  | 4.90 | 0.44 | 9.69E-06 |
| RS16962242 | 17.0 | 0.86 | 9.74E-06 |
| RS7339053  | 13.0 | 0.72 | 9.83E-06 |
| RS720844   | 3.98 | 0.39 | 1.00E-05 |
| RS7905504  | 8.73 | 0.79 | 1.02E-05 |
| RS12605132 | 19.3 | 1.02 | 1.03E-05 |
| RS12257301 | 5.45 | 0.46 | 1.06E-05 |
| RS615026   | 16.7 | 1.11 | 1.09E-05 |
| RS17836804 | 10.8 | 0.66 | 1.10E-05 |
| RS10819779 | 43.8 | 1.62 | 1.13E-05 |
| RS1053726  | 11.4 | 0.71 | 1.14E-05 |
| RS4134872  | 15.9 | 0.83 | 1.14E-05 |
| RS17043519 | 13.2 | 0.82 | 1.19E-05 |
| RS16914101 | 4.81 | 0.46 | 1.19E-05 |
| RS952932   | 19.3 | 1.04 | 1.20E-05 |
| RS7200988  | 13.2 | 0.73 | 1.25E-05 |
| RS11209878 | 5.69 | 0.76 | 1.28E-05 |
| RS4414501  | 4.04 | 0.37 | 1.28E-05 |
| RS7195194  | 4.04 | 0.37 | 1.28E-05 |
| RS17064440 | 5.45 | 0.64 | 1.29E-05 |
| RS6957127  | 11.4 | 0.85 | 1.30E-05 |
| RS7315359  | 4.29 | 0.42 | 1.30E-05 |
| RS10021155 | 18.2 | 1.09 | 1.33E-05 |
| RS10129758 | 5.21 | 0.50 | 1.33E-05 |
| RS7543809  | 9.17 | 0.61 | 1.34E-05 |
| RS16832352 | 18.0 | 1.09 | 1.34E-05 |
| RS2510157  | 3.98 | 0.45 | 1.35E-05 |
| RS256811   | 3.61 | 0.39 | 1.35E-05 |
| RS16944118 | 5.45 | 0.50 | 1.37E-05 |
| RS7970417  | 8.73 | 0.58 | 1.40E-05 |
| RS17149626 | 18.2 | 1.09 | 1.40E-05 |
| RS35486143 | 50.7 | 5.30 | 1.41E-05 |
| RS16919174 | 113  | 2.36 | 1.43E-05 |
| RS4837752  | 3.86 | 0.40 | 1.43E-05 |
| RS10190087 | 8.97 | 0.61 | 1.45E-05 |
| RS13426621 | 19.7 | 1.10 | 1.45E-05 |

|            |      |      |          |
|------------|------|------|----------|
| RS12541465 | 4.26 | 0.44 | 1.46E-05 |
| RS9477218  | 44.6 | 1.35 | 1.47E-05 |
| RS17853024 | 15.5 | 0.75 | 1.48E-05 |
| RS3181718  | 15.4 | 0.88 | 1.51E-05 |
| RS4789729  | 3.96 | 0.40 | 1.53E-05 |
| RS9567063  | 14.0 | 0.82 | 1.53E-05 |
| RS9554568  | 15.1 | 0.87 | 1.55E-05 |
| RS9633677  | 11.8 | 0.73 | 1.58E-05 |
| RS7980687  | 4.73 | 0.43 | 1.59E-05 |
| RS1846413  | 4.61 | 0.55 | 1.59E-05 |
| RS6254     | 20.2 | 1.03 | 1.59E-05 |
| RS17204629 | 14.5 | 1.01 | 1.60E-05 |
| RS11912074 | 3.71 | 0.37 | 1.63E-05 |
| RS10018408 | 60.9 | 1.91 | 1.63E-05 |
| RS9261219  | 12.6 | 0.80 | 1.65E-05 |
| RS12166034 | 7.97 | 0.64 | 1.66E-05 |
| RS1147572  | 27.3 | 1.11 | 1.67E-05 |
| RS1593415  | 14.5 | 1.05 | 1.68E-05 |
| RS12777098 | 16.6 | 1.02 | 1.70E-05 |
| RS12445943 | 5.43 | 0.46 | 1.73E-05 |
| RS11012350 | 4.63 | 0.53 | 1.73E-05 |
| RS1881466  | 20.5 | 1.15 | 1.74E-05 |
| RS12056645 | 4.82 | 0.46 | 1.76E-05 |
| RS9464413  | 10.0 | 0.63 | 1.76E-05 |
| RS1796306  | 11.2 | 0.75 | 1.76E-05 |
| RS9396245  | 9.97 | 0.63 | 1.76E-05 |
| RS7803922  | 4.43 | 0.42 | 1.77E-05 |
| RS4943266  | 5.71 | 0.61 | 1.78E-05 |
| RS7768403  | 52.9 | 1.88 | 1.78E-05 |
| RS12807369 | 5.37 | 0.50 | 1.79E-05 |
| RS2516698  | 4.37 | 0.47 | 1.80E-05 |
| RS11773898 | 6.07 | 0.53 | 1.83E-05 |
| RS7295749  | 4.04 | 0.52 | 1.83E-05 |
| RS7989565  | 75.5 | 1.70 | 1.86E-05 |
| RS2592394  | 4.87 | 0.44 | 1.88E-05 |
| RS9304301  | 17.3 | 0.98 | 1.89E-05 |
| RS7301563  | 12.3 | 0.92 | 1.91E-05 |
| RS12612150 | 10.6 | 0.79 | 1.91E-05 |
| RS10508336 | 34.8 | 1.42 | 1.92E-05 |
| RS17168377 | 10.4 | 0.68 | 1.93E-05 |
| RS13312723 | 20.2 | 1.15 | 1.93E-05 |
| RS8064257  | 9.17 | 0.66 | 1.93E-05 |
| RS16975650 | 8.24 | 0.58 | 1.93E-05 |
| RS17047453 | 9.87 | 0.64 | 1.99E-05 |
| RS9557176  | 14.8 | 0.87 | 2.00E-05 |
| RS2243411  | 9.39 | 0.60 | 2.01E-05 |
| RS1684978  | 3.70 | 0.38 | 2.01E-05 |
| RS8030348  | 16.0 | 0.98 | 2.01E-05 |
| RS1960306  | 4.59 | 0.54 | 2.04E-05 |
| RS2243796  | 13.4 | 0.93 | 2.04E-05 |
| RS16981522 | 905  | 6.73 | 2.08E-05 |
| RS12024301 | 4.63 | 0.58 | 2.08E-05 |

|            |       |      |          |
|------------|-------|------|----------|
| RS7901466  | 11.9  | 0.71 | 2.10E-05 |
| RS3784246  | 12.4  | 0.77 | 2.10E-05 |
| RS7655674  | 7.83  | 0.56 | 2.11E-05 |
| RS11975647 | 4.97  | 0.55 | 2.15E-05 |
| RS10115371 | 5.54  | 0.45 | 2.19E-05 |
| RS6909762  | 50.8  | 1.73 | 2.19E-05 |
| RS12038357 | 36.0  | 1.20 | 2.20E-05 |
| RS11771793 | 4.39  | 0.41 | 2.21E-05 |
| RS1451882  | 13.1  | 0.91 | 2.22E-05 |
| RS7730356  | 14.1  | 0.88 | 2.23E-05 |
| RS16976904 | 16.3  | 0.88 | 2.25E-05 |
| RS1013870  | 19.4  | 1.15 | 2.26E-05 |
| RS9345068  | 12.3  | 0.84 | 2.26E-05 |
| RS10178114 | 20.0  | 1.52 | 2.28E-05 |
| RS7323678  | 4.55  | 0.50 | 2.29E-05 |
| RS16910400 | 4.95  | 0.56 | 2.30E-05 |
| RS8073525  | 13.7  | 0.91 | 2.32E-05 |
| RS4605886  | 5.20  | 0.56 | 2.35E-05 |
| RS12247913 | 3.86  | 0.50 | 2.37E-05 |
| RS12175863 | 19.3  | 1.31 | 2.40E-05 |
| RS1372202  | 10.7  | 0.72 | 2.40E-05 |
| RS10978077 | 4.58  | 0.45 | 2.41E-05 |
| RS7724962  | 3.79  | 0.44 | 2.41E-05 |
| RS11618570 | 4.01  | 0.40 | 2.44E-05 |
| RS2099269  | 8.46  | 0.55 | 2.47E-05 |
| RS17123327 | 12.6  | 0.90 | 2.50E-05 |
| RS17135409 | 3.70  | 0.45 | 2.51E-05 |
| RS16904171 | 17.4  | 1.05 | 2.54E-05 |
| RS17050725 | 12.4  | 1.03 | 2.54E-05 |
| RS12306432 | 9.06  | 0.61 | 2.57E-05 |
| RS7386256  | 7.62  | 0.65 | 2.64E-05 |
| RS17806552 | 23.6  | 1.21 | 2.65E-05 |
| RS7830816  | 4.25  | 0.42 | 2.67E-05 |
| RS2048917  | 4.31  | 0.41 | 2.67E-05 |
| RS16965676 | 23.4  | 1.00 | 2.67E-05 |
| RS901720   | 6.22  | 0.51 | 2.68E-05 |
| RS12214948 | 12.3  | 0.91 | 2.68E-05 |
| RS1342760  | 20.1  | 1.00 | 2.71E-05 |
| RS10138933 | 4.63  | 0.51 | 2.73E-05 |
| RS7874051  | 26144 | 9.15 | 2.74E-05 |
| RS10134584 | 4.99  | 0.51 | 2.74E-05 |
| RS17139138 | 6.97  | 0.51 | 2.75E-05 |
| RS17248859 | 6.13  | 0.62 | 2.76E-05 |
| RS12640471 | 22.4  | 1.42 | 2.78E-05 |
| RS12308044 | 7.40  | 0.55 | 2.78E-05 |
| RS17039638 | 18.4  | 1.08 | 2.80E-05 |
| RS4134901  | 30.0  | 1.55 | 2.82E-05 |
| RS10947929 | 4.19  | 0.41 | 2.87E-05 |
| RS12047483 | 11.2  | 0.77 | 2.90E-05 |
| RS239027   | 3.65  | 0.38 | 2.93E-05 |
| RS4752066  | 4.25  | 0.48 | 2.96E-05 |
| RS8973     | 5.74  | 0.64 | 2.97E-05 |



|            |       |       |          |
|------------|-------|-------|----------|
| RS6697084  | 9.33  | 0.66  | 3.00E-05 |
| RS623899   | 46.1  | 1.67  | 3.01E-05 |
| RS188750   | 7.83  | 0.60  | 3.07E-05 |
| RS4831658  | 4.69  | 0.50  | 3.08E-05 |
| RS13259685 | 4.17  | 0.38  | 3.09E-05 |
| RS11874308 | 3.78  | 0.39  | 3.13E-05 |
| RS11990843 | 4.59  | 0.48  | 3.13E-05 |
| RS9481643  | 14.4  | 0.89  | 3.17E-05 |
| RS10999594 | 3.87  | 0.48  | 3.19E-05 |
| RS1503849  | 6.83  | 0.53  | 3.22E-05 |
| RS2281558  | 4.10  | 0.40  | 3.23E-05 |
| RS12582044 | 8.73  | 0.66  | 3.25E-05 |
| RS665974   | 4.93  | 0.45  | 3.30E-05 |
| RS1055970  | 4.28  | 0.49  | 3.35E-05 |
| RS936115   | 17.5  | 0.95  | 3.46E-05 |
| RS1378683  | 17.5  | 0.95  | 3.46E-05 |
| RS12769955 | 13.5  | 0.75  | 3.48E-05 |
| RS17058330 | 4.71  | 0.53  | 3.48E-05 |
| RS12056981 | 56.8  | 1.83  | 3.49E-05 |
| RS6464215  | 4.67  | 0.42  | 3.51E-05 |
| RS17064584 | 5.28  | 0.60  | 3.57E-05 |
| RS12528404 | 8.65  | 0.70  | 3.58E-05 |
| RS1112868  | 38.2  | 1.28  | 3.60E-05 |
| RS11605275 | 5.22  | 0.65  | 3.64E-05 |
| RS2066098  | 92.4  | 2.80  | 3.70E-05 |
| RS10827150 | 12.1  | 0.82  | 3.75E-05 |
| RS16869245 | 14.3  | 0.95  | 3.75E-05 |
| RS1550558  | 4.85  | 0.45  | 3.77E-05 |
| RS12196677 | 12.4  | 0.75  | 3.77E-05 |
| RS13257525 | 3.92  | 0.37  | 3.77E-05 |
| RS17725600 | 13.2  | 0.91  | 3.78E-05 |
| RS939052   | 3.74  | 0.39  | 3.79E-05 |
| RS2033466  | 10.6  | 0.68  | 3.81E-05 |
| RS13141109 | 4.25  | 0.48  | 3.81E-05 |
| RS6537319  | 13.1  | 0.91  | 3.84E-05 |
| RS6677436  | 4.88  | 0.41  | 3.84E-05 |
| RS10170657 | 8.88  | 0.71  | 3.86E-05 |
| RS7752599  | 3.97  | 0.43  | 3.92E-05 |
| RS10518850 | 15.7  | 0.88  | 3.98E-05 |
| RS16976913 | 15.7  | 0.88  | 3.98E-05 |
| RS12247544 | 4.50  | 0.49  | 4.01E-05 |
| RS7358822  | 4.01  | 0.46  | 4.04E-05 |
| RS16852893 | 6.35  | 0.64  | 4.04E-05 |
| RS328996   | 9.07  | 0.63  | 4.05E-05 |
| RS12704294 | 11272 | 10.59 | 4.05E-05 |
| RS16953011 | 19.4  | 1.04  | 4.12E-05 |
| RS10086104 | 10.5  | 0.67  | 4.12E-05 |
| RS17194824 | 4.12  | 0.46  | 4.13E-05 |
| RS10487085 | 3.72  | 0.40  | 4.13E-05 |
| RS10408321 | 6.76  | 0.68  | 4.14E-05 |
| RS13275996 | 80.7  | 2.34  | 4.15E-05 |
| RS12458041 | 9.84  | 0.65  | 4.23E-05 |

|            |      |      |          |
|------------|------|------|----------|
| RS2903016  | 9.09 | 0.61 | 4.24E-05 |
| RS1048664  | 4.12 | 0.46 | 4.27E-05 |
| RS6678735  | 5.31 | 0.71 | 4.28E-05 |
| RS4948722  | 12.8 | 0.86 | 4.29E-05 |
| RS2844754  | 4.11 | 0.46 | 4.35E-05 |
| RS9365409  | 202  | 3.76 | 4.36E-05 |
| RS17081017 | 12.0 | 0.78 | 4.38E-05 |
| RS9853287  | 10.6 | 0.75 | 4.39E-05 |
| RS16903467 | 15.9 | 1.01 | 4.39E-05 |
| RS9356334  | 67.0 | 2.13 | 4.40E-05 |
| RS12980609 | 3.48 | 0.40 | 4.40E-05 |
| RS10001567 | 10.3 | 0.73 | 4.45E-05 |
| RS9833934  | 10.8 | 0.78 | 4.45E-05 |
| RS17469385 | 9.95 | 0.98 | 4.47E-05 |
| RS10059433 | 4.78 | 0.57 | 4.47E-05 |
| RS11915226 | 5.05 | 0.65 | 4.48E-05 |
| RS1450667  | 347  | 6.20 | 4.50E-05 |
| RS9394969  | 5.38 | 0.44 | 4.54E-05 |
| RS9367486  | 38.6 | 1.41 | 4.56E-05 |
| RS720840   | 10.2 | 0.69 | 4.60E-05 |
| RS10130219 | 3.82 | 0.53 | 4.60E-05 |
| RS973954   | 3.89 | 0.45 | 4.62E-05 |
| RS4798730  | 2059 | 4.01 | 4.66E-05 |
| RS7563103  | 5.03 | 0.47 | 4.66E-05 |
| RS582581   | 49.1 | 1.69 | 4.67E-05 |
| RS9859653  | 8.69 | 0.66 | 4.70E-05 |
| RS2389672  | 4.41 | 0.48 | 4.72E-05 |
| RS11109007 | 17.0 | 1.09 | 4.75E-05 |
| RS6830548  | 4.30 | 0.53 | 4.79E-05 |
| RS7644677  | 10.1 | 0.83 | 4.80E-05 |
| RS10196592 | 34.7 | 1.60 | 4.80E-05 |
| RS17007551 | 8.02 | 0.61 | 4.81E-05 |
| RS3219474  | 7.94 | 0.77 | 4.84E-05 |
| RS2044457  | 11.0 | 0.72 | 4.86E-05 |
| RS7821128  | 3.81 | 0.41 | 4.87E-05 |
| RS12574588 | 34.8 | 1.38 | 4.87E-05 |
| RS283619   | 4.08 | 0.38 | 4.88E-05 |
| RS35918317 | 14.6 | 0.85 | 4.88E-05 |
| RS11022114 | 11.1 | 0.73 | 4.90E-05 |
| RS10106404 | 10.6 | 0.76 | 4.92E-05 |
| RS17396885 | 7.31 | 0.63 | 4.92E-05 |
| RS9365411  | 4.45 | 0.46 | 4.93E-05 |
| GA009992   | 4.20 | 0.44 | 4.93E-05 |
| RS11827555 | 4.41 | 0.57 | 4.94E-05 |
| RS12108835 | 21.1 | 1.13 | 4.95E-05 |
| GA010364   | 4.30 | 0.43 | 4.96E-05 |
| RS895423   | 11.8 | 0.76 | 5.00E-05 |
| RS9866608  | 7.01 | 0.54 | 5.01E-05 |
| RS3905000  | 4.42 | 0.45 | 5.01E-05 |
| RS6564716  | 4.36 | 0.51 | 5.07E-05 |
| RS17025036 | 4.18 | 0.49 | 5.08E-05 |
| RS4714513  | 4.30 | 0.40 | 5.09E-05 |

|            |      |      |          |
|------------|------|------|----------|
| RS6913042  | 10.5 | 0.66 | 5.09E-05 |
| RS17153639 | 8.09 | 0.63 | 5.12E-05 |
| RS6127146  | 20.0 | 1.10 | 5.12E-05 |
| RS7185036  | 3.80 | 0.38 | 5.15E-05 |
| RS672095   | 9.49 | 0.66 | 5.19E-05 |
| RS10023523 | 4.20 | 0.40 | 5.19E-05 |
| RS3774902  | 3.84 | 0.47 | 5.21E-05 |
| RS11853488 | 9.30 | 0.86 | 5.23E-05 |
| RS12915512 | 9.49 | 0.68 | 5.25E-05 |
| RS28628372 | 9.50 | 0.68 | 5.26E-05 |
| RS6873939  | 4.11 | 0.45 | 5.27E-05 |
| RS10252263 | 4.73 | 0.42 | 5.28E-05 |
| RS8892     | 3.97 | 0.44 | 5.31E-05 |
| RS7982202  | 6.24 | 0.72 | 5.32E-05 |
| RS2382882  | 4.24 | 0.50 | 5.37E-05 |
| RS9468600  | 10.7 | 0.84 | 5.42E-05 |
| RS6725219  | 15.2 | 1.08 | 5.43E-05 |
| RS4134885  | 25.0 | 1.52 | 5.45E-05 |
| RS9266777  | 48.6 | 1.90 | 5.45E-05 |
| RS17429538 | 28.7 | 1.20 | 5.50E-05 |
| RS10893404 | 4.28 | 0.43 | 5.53E-05 |
| RS16923623 | 9.35 | 0.64 | 5.56E-05 |
| RS17125553 | 4.43 | 0.47 | 5.56E-05 |
| RS17405840 | 21.3 | 1.20 | 5.57E-05 |
| RS749822   | 17.3 | 1.27 | 5.58E-05 |
| RS720214   | 6.59 | 0.54 | 5.60E-05 |
| RS11997816 | 10.1 | 0.96 | 5.66E-05 |
| RS711825   | 4.39 | 0.42 | 5.66E-05 |
| RS4867495  | 12.3 | 1.00 | 5.68E-05 |
| RS9872679  | 6.59 | 0.54 | 5.75E-05 |
| RS7902671  | 12.9 | 0.85 | 5.80E-05 |
| RS575323   | 9.81 | 0.73 | 5.82E-05 |
| RS12906810 | 10.2 | 0.68 | 5.88E-05 |
| RS202390   | 10.4 | 0.77 | 5.88E-05 |
| RS510463   | 9.80 | 0.73 | 5.89E-05 |
| RS1540151  | 5.07 | 0.44 | 5.90E-05 |
| RS1671400  | 6.84 | 0.56 | 5.92E-05 |
| RS9448502  | 23.6 | 1.20 | 6.02E-05 |
| RS9382099  | 27.7 | 1.52 | 6.02E-05 |
| RS2280569  | 4.41 | 0.41 | 6.02E-05 |
| RS225872   | 19.9 | 1.23 | 6.06E-05 |
| RS17047440 | 7.76 | 0.60 | 6.10E-05 |
| RS28496502 | 3.97 | 0.39 | 6.13E-05 |
| RS693978   | 4.70 | 0.42 | 6.13E-05 |
| RS9822767  | 4.17 | 0.47 | 6.18E-05 |
| RS7677523  | 10.4 | 0.78 | 6.19E-05 |
| RS34509814 | 9.47 | 0.69 | 6.24E-05 |
| RS9484096  | 12.8 | 1.06 | 6.25E-05 |
| RS12232326 | 17.6 | 0.96 | 6.28E-05 |
| RS4771953  | 10.6 | 0.69 | 6.29E-05 |
| RS11646066 | 4.90 | 0.44 | 6.53E-05 |
| RS9890685  | 11.9 | 0.86 | 6.56E-05 |

|            |      |      |          |
|------------|------|------|----------|
| RS16837982 | 17.7 | 1.03 | 6.58E-05 |
| RS16891597 | 4.26 | 0.47 | 6.59E-05 |
| RS4721648  | 0.19 | 0.46 | 6.60E-05 |
| RS8133734  | 7.85 | 0.65 | 6.60E-05 |
| RS3737269  | 12.0 | 0.77 | 6.62E-05 |
| RS10094712 | 9.83 | 0.80 | 6.63E-05 |
| RS28539472 | 3.95 | 0.39 | 6.63E-05 |
| RS3123501  | 8.84 | 0.62 | 6.65E-05 |
| RS907795   | 11.7 | 0.72 | 6.67E-05 |
| RS716478   | 76.3 | 1.98 | 6.68E-05 |
| RS4634736  | 8.84 | 0.62 | 6.74E-05 |
| RS7088089  | 3.52 | 0.48 | 6.79E-05 |
| RS7350409  | 12.1 | 0.79 | 6.79E-05 |
| RS16856762 | 2454 | 6.66 | 6.87E-05 |
| RS1028120  | 3.46 | 0.37 | 6.88E-05 |
| RS2014220  | 4.78 | 0.42 | 6.89E-05 |
| RS12572135 | 12.1 | 0.79 | 6.90E-05 |
| RS6480463  | 4.50 | 0.40 | 6.99E-05 |
| RS6955966  | 4.72 | 0.42 | 6.99E-05 |
| RS7185877  | 3.94 | 0.39 | 7.00E-05 |
| RS6804377  | 4.19 | 0.43 | 7.04E-05 |
| RS7754365  | 11.3 | 0.83 | 7.09E-05 |
| RS12059484 | 4.17 | 0.45 | 7.09E-05 |
| RS4629304  | 4.20 | 0.50 | 7.12E-05 |
| RS6113950  | 12.8 | 0.85 | 7.19E-05 |
| RS34717587 | 27.3 | 1.53 | 7.20E-05 |
| RS3125785  | 8.72 | 0.62 | 7.26E-05 |
| RS4945880  | 9.65 | 0.72 | 7.32E-05 |
| RS1396531  | 9.24 | 0.84 | 7.37E-05 |
| RS328489   | 9.46 | 0.76 | 7.38E-05 |
| RS9328707  | 4.00 | 0.39 | 7.40E-05 |
| RS3915964  | 47.2 | 1.90 | 7.43E-05 |
| RS4129826  | 3.81 | 0.37 | 7.44E-05 |
| RS2798815  | 3.66 | 0.42 | 7.51E-05 |
| RS3885071  | 7.56 | 0.61 | 7.52E-05 |
| RS1511576  | 5.75 | 0.47 | 7.53E-05 |
| RS10462823 | 12.8 | 1.02 | 7.61E-05 |
| RS9821348  | 14.5 | 0.97 | 7.62E-05 |
| RS1488831  | 8.16 | 0.59 | 7.64E-05 |
| RS39986    | 3.20 | 0.37 | 7.65E-05 |
| RS3088324  | 10.4 | 0.73 | 7.69E-05 |
| RS35142427 | 4.17 | 0.44 | 7.71E-05 |
| RS10218979 | 12.5 | 0.87 | 7.73E-05 |
| RS9304276  | 4.31 | 0.52 | 7.76E-05 |
| RS165569   | 3.83 | 0.43 | 7.80E-05 |
| RS8020981  | 12.0 | 1.10 | 7.81E-05 |
| RS4686334  | 7.71 | 0.60 | 7.82E-05 |
| RS12422977 | 14.8 | 0.94 | 7.85E-05 |
| RS16965811 | 4.68 | 0.63 | 7.86E-05 |
| RS561735   | 9.63 | 0.73 | 7.89E-05 |
| RS7261777  | 4.34 | 0.44 | 7.96E-05 |
| RS7861556  | 4.01 | 0.42 | 7.97E-05 |

|            |      |      |          |
|------------|------|------|----------|
| RS17194551 | 4.78 | 0.62 | 7.97E-05 |
| RS225475   | 3.65 | 0.45 | 8.04E-05 |
| RS7873053  | 4.24 | 0.40 | 8.04E-05 |
| RS9867900  | 3.99 | 0.43 | 8.06E-05 |
| RS7974564  | 6.49 | 0.52 | 8.14E-05 |
| RS4368817  | 12.2 | 0.89 | 8.17E-05 |
| RS939048   | 3.50 | 0.38 | 8.20E-05 |
| RS6880907  | 4.29 | 0.55 | 8.27E-05 |
| RS10173820 | 4.19 | 0.43 | 8.29E-05 |
| RS1203814  | 3.95 | 0.38 | 8.32E-05 |
| RS1527087  | 3.98 | 0.50 | 8.35E-05 |
| RS163253   | 7.65 | 0.62 | 8.35E-05 |
| RS17006368 | 25.8 | 1.21 | 8.36E-05 |
| RS7337274  | 10.2 | 0.73 | 8.39E-05 |
| RS958888   | 10.6 | 0.72 | 8.40E-05 |
| RS4684618  | 6.46 | 0.58 | 8.42E-05 |
| RS17081086 | 11.2 | 0.76 | 8.43E-05 |
| RS7645471  | 4.42 | 0.40 | 8.45E-05 |
| RS10117316 | 24.3 | 1.41 | 8.48E-05 |
| RS10236400 | 3.90 | 0.45 | 8.52E-05 |
| RS12354    | 14.9 | 1.09 | 8.53E-05 |
| RS12419635 | 17.9 | 1.05 | 8.53E-05 |
| RS16857235 | 6.25 | 0.57 | 8.65E-05 |
| RS1563066  | 4.81 | 0.44 | 8.66E-05 |
| RS2843557  | 27.0 | 1.37 | 8.72E-05 |
| RS17065076 | 6.34 | 0.55 | 8.74E-05 |
| RS10181159 | 15.5 | 1.07 | 8.75E-05 |
| RS17138263 | 4.09 | 0.49 | 8.81E-05 |
| RS12061545 | 4.52 | 0.45 | 8.85E-05 |
| RS6982045  | 10.8 | 0.77 | 8.89E-05 |
| RS16919776 | 10.1 | 0.82 | 8.90E-05 |
| RS6789607  | 4.98 | 0.43 | 8.97E-05 |
| RS519800   | 3.72 | 0.50 | 9.00E-05 |
| RS28588913 | 9.39 | 0.67 | 9.03E-05 |
| RS36046152 | 11.9 | 0.92 | 9.06E-05 |
| RS405031   | 4.30 | 0.41 | 9.08E-05 |
| RS11602119 | 26.3 | 1.61 | 9.08E-05 |
| RS10421078 | 21.9 | 1.09 | 9.09E-05 |
| RS4847100  | 5.79 | 0.46 | 9.09E-05 |
| RS11466659 | 7.76 | 0.65 | 9.10E-05 |
| RS11466648 | 7.76 | 0.65 | 9.10E-05 |
| RS17473999 | 11.1 | 0.74 | 9.14E-05 |
| RS3860270  | 14.2 | 0.86 | 9.15E-05 |
| RS16868737 | 7.07 | 0.58 | 9.24E-05 |
| RS4910297  | 4.38 | 0.40 | 9.25E-05 |
| RS131992   | 4.26 | 0.43 | 9.26E-05 |
| RS12813784 | 4.20 | 0.48 | 9.27E-05 |
| RS11971803 | 4.77 | 0.53 | 9.34E-05 |
| RS8083849  | 4.23 | 0.39 | 9.35E-05 |
| RS6420969  | 4.12 | 0.56 | 9.40E-05 |
| RS13395146 | 7.15 | 0.58 | 9.49E-05 |
| RS13433067 | 7.15 | 0.58 | 9.49E-05 |

|            |      |      |          |
|------------|------|------|----------|
| RS16983864 | 7.15 | 0.58 | 9.49E-05 |
| RS10166369 | 7.15 | 0.58 | 9.49E-05 |
| RS10177628 | 7.15 | 0.58 | 9.49E-05 |
| RS9306857  | 7.15 | 0.58 | 9.49E-05 |
| RS10031329 | 9.55 | 0.65 | 9.51E-05 |
| RS12268694 | 20.9 | 1.34 | 9.53E-05 |
| RS17148760 | 12.2 | 0.92 | 9.54E-05 |
| RS590503   | 10.3 | 0.82 | 9.55E-05 |
| RS13390998 | 16.5 | 1.44 | 9.62E-05 |
| RS12101957 | 9.26 | 0.66 | 9.64E-05 |
| RS28394527 | 9.26 | 0.66 | 9.64E-05 |
| RS11183471 | 6.96 | 0.57 | 9.68E-05 |
| RS11851536 | 3.65 | 0.50 | 9.77E-05 |
| RS8068326  | 11.4 | 0.86 | 9.78E-05 |
| RS7995134  | 4.55 | 0.57 | 9.81E-05 |
| RS4897936  | 15.6 | 1.21 | 9.87E-05 |
| RS1055160  | 3.92 | 0.42 | 9.91E-05 |
| RS2622695  | 5.10 | 0.43 | 9.93E-05 |
| RS1250309  | 8.88 | 0.64 | 9.96E-05 |
| RS16938445 | 8.15 | 0.66 | 9.97E-05 |
| RS11222977 | 4.33 | 0.43 | 9.97E-05 |
