# Supplementary material for: Genetic Variants in the Bone Morphogenic Protein Gene Family Modify the Association between Residential Exposure to Traffic and Peripheral Arterial Disease
Source: PLOS journal article supplement (doi:10.1371/journal.pone.0152670), 2016-04-15
Supplement: S6 (10.1371/journal.pone.0152670.s006) [file journal.pone.0152670.s006.PDF › journal.pone.0152670.s006.PDF]

S3 Table (a). EA GWIS Associations with  $P < 1 \times 10^{-4}$  in primary model (race, sex, and principal component adjusted)

| SNP        | Odds Ratio | SE   | P        |
|------------|------------|------|----------|
| rs755249   | 3.45       | 0.23 | 2.29E-08 |
| rs9409787  | 4.93       | 0.33 | 6.87E-08 |
| rs17513135 | 3.34       | 0.24 | 1.33E-07 |
| rs16890431 | 10.29      | 0.62 | 7.40E-07 |
| rs4660214  | 3.08       | 0.24 | 1.26E-06 |
| rs2296172  | 3.08       | 0.24 | 1.28E-06 |
| rs3768302  | 3.08       | 0.24 | 1.28E-06 |
| rs2296173  | 3.08       | 0.24 | 1.28E-06 |
| rs16826093 | 3.07       | 0.24 | 1.33E-06 |
| rs16826069 | 2.99       | 0.24 | 1.35E-06 |
| rs7539279  | 2.81       | 0.22 | 1.41E-06 |
| rs3738676  | 2.81       | 0.22 | 1.51E-06 |
| rs7520271  | 2.80       | 0.22 | 1.55E-06 |
| rs2282231  | 3.07       | 0.25 | 1.62E-06 |
| rs1317681  | 3.57       | 0.29 | 2.21E-06 |
| rs2479587  | 7.07       | 0.48 | 2.26E-06 |
| rs10063408 | 2.83       | 0.23 | 3.57E-06 |
| rs10491083 | 5.27       | 0.45 | 4.51E-06 |
| rs11206378 | 2.64       | 0.22 | 5.98E-06 |
| rs6879255  | 2.68       | 0.22 | 6.06E-06 |
| rs12195741 | 2.50       | 0.21 | 6.32E-06 |
| rs9548897  | 2.76       | 0.23 | 6.61E-06 |
| rs12651722 | 2.66       | 0.23 | 7.36E-06 |
| rs6045173  | 0.39       | 0.21 | 7.70E-06 |
| rs10788933 | 2.76       | 0.23 | 7.72E-06 |
| rs2431268  | 2.67       | 0.23 | 7.76E-06 |
| rs2653622  | 7.67       | 0.57 | 7.93E-06 |
| rs11202287 | 4.31       | 0.36 | 8.55E-06 |
| rs10788925 | 2.71       | 0.23 | 1.08E-05 |
| rs12434963 | 0.39       | 0.22 | 1.32E-05 |
| rs10979826 | 3.32       | 0.28 | 1.45E-05 |
| rs11202282 | 3.69       | 0.32 | 1.48E-05 |
| rs3850947  | 2.89       | 0.25 | 1.58E-05 |
| rs16837533 | 3.19       | 0.28 | 1.59E-05 |
| rs587404   | 2.57       | 0.22 | 1.69E-05 |
| rs643099   | 3.92       | 0.37 | 1.69E-05 |
| rs11249617 | 2.73       | 0.25 | 1.77E-05 |
| rs2275188  | 2.56       | 0.22 | 1.79E-05 |
| rs2275187  | 2.57       | 0.22 | 1.80E-05 |
| rs7554206  | 2.56       | 0.22 | 1.82E-05 |
| rs4904089  | 2.72       | 0.25 | 1.86E-05 |
| rs2484749  | 2.65       | 0.23 | 1.92E-05 |
| rs13374459 | 2.47       | 0.21 | 1.97E-05 |
| rs2185458  | 2.70       | 0.25 | 1.98E-05 |
| rs460911   | 2.67       | 0.24 | 2.03E-05 |
| rs2746183  | 3.09       | 0.28 | 2.16E-05 |
| rs7186248  | 0.39       | 0.23 | 2.18E-05 |
| rs17109801 | 2.65       | 0.24 | 2.22E-05 |
| rs6873809  | 2.39       | 0.21 | 2.24E-05 |
| rs16890409 | 2.85       | 0.26 | 2.24E-05 |
| rs2123811  | 2.39       | 0.21 | 2.37E-05 |
| rs10050893 | 2.39       | 0.21 | 2.37E-05 |
| rs10493087 | 2.53       | 0.22 | 2.39E-05 |
| rs7448872  | 2.38       | 0.21 | 2.40E-05 |
| rs398293   | 0.39       | 0.23 | 2.54E-05 |

|            |        |      |          |
|------------|--------|------|----------|
| rs11966101 | 9.26   | 0.65 | 2.62E-05 |
| rs6893716  | 103.25 | 1.72 | 2.63E-05 |
| rs1622879  | 0.41   | 0.21 | 2.80E-05 |
| rs4962067  | 3.95   | 0.36 | 2.87E-05 |
| rs12030495 | 2.39   | 0.21 | 2.91E-05 |
| rs2866622  | 2.54   | 0.23 | 2.95E-05 |
| rs6780357  | 5.91   | 0.46 | 2.96E-05 |
| rs710913   | 2.42   | 0.21 | 3.04E-05 |
| rs7780899  | 2.81   | 0.26 | 3.15E-05 |
| rs6594781  | 2.33   | 0.21 | 3.19E-05 |
| rs4340770  | 0.41   | 0.21 | 3.20E-05 |
| rs1867114  | 3.04   | 0.29 | 3.20E-05 |
| rs1537818  | 2.51   | 0.23 | 3.21E-05 |
| rs11903500 | 2.49   | 0.23 | 3.22E-05 |
| rs2129209  | 0.19   | 0.42 | 3.60E-05 |
| rs1180320  | 0.42   | 0.21 | 3.60E-05 |
| rs11716183 | 5.83   | 0.46 | 3.65E-05 |
| rs11717532 | 5.83   | 0.46 | 3.65E-05 |
| rs6712892  | 0.26   | 0.34 | 3.78E-05 |
| rs2699502  | 0.39   | 0.23 | 3.88E-05 |
| rs1208217  | 0.40   | 0.23 | 4.32E-05 |
| rs11733284 | 2.38   | 0.22 | 4.57E-05 |
| rs6132020  | 2.48   | 0.23 | 4.59E-05 |
| rs1161240  | 0.43   | 0.21 | 4.71E-05 |
| rs973148   | 2.47   | 0.23 | 4.77E-05 |
| rs1411500  | 14.78  | 0.87 | 4.81E-05 |
| rs10983084 | 0.40   | 0.23 | 4.89E-05 |
| rs12574080 | 4.90   | 0.43 | 4.99E-05 |
| rs7176855  | 3.55   | 0.34 | 5.00E-05 |
| rs10978620 | 2.62   | 0.25 | 5.01E-05 |
| rs1080382  | 2.33   | 0.21 | 5.02E-05 |
| rs7863929  | 2.61   | 0.24 | 5.19E-05 |
| rs16856197 | 11.52  | 0.73 | 5.30E-05 |
| rs6440276  | 11.52  | 0.73 | 5.31E-05 |
| rs337520   | 2.63   | 0.24 | 5.49E-05 |
| rs10437580 | 0.41   | 0.22 | 5.61E-05 |
| rs1610062  | 2.49   | 0.23 | 5.63E-05 |
| rs6570048  | 0.42   | 0.22 | 5.80E-05 |
| rs4716100  | 0.38   | 0.24 | 5.91E-05 |
| rs9466456  | 2.44   | 0.23 | 5.95E-05 |
| rs11852841 | 2.30   | 0.21 | 5.96E-05 |
| rs16975251 | 2.46   | 0.23 | 5.96E-05 |
| rs12471388 | 2.69   | 0.27 | 5.97E-05 |
| rs6726083  | 2.70   | 0.27 | 5.99E-05 |
| rs16981576 | 4.53   | 0.40 | 6.01E-05 |
| rs9395234  | 0.30   | 0.31 | 6.02E-05 |
| rs12883063 | 2.53   | 0.24 | 6.09E-05 |
| rs41275646 | 7.64   | 0.62 | 6.14E-05 |
| rs10934751 | 0.40   | 0.23 | 6.15E-05 |
| rs7448169  | 2.26   | 0.21 | 6.42E-05 |
| rs7047726  | 3.67   | 0.35 | 6.43E-05 |
| rs321631   | 2.36   | 0.22 | 6.45E-05 |
| rs7031088  | 2.38   | 0.22 | 6.85E-05 |
| rs1510937  | 0.40   | 0.23 | 6.92E-05 |
| rs2294845  | 2.36   | 0.22 | 6.92E-05 |
| rs1345517  | 2.68   | 0.26 | 6.97E-05 |
| rs6894718  | 2.26   | 0.21 | 7.00E-05 |

|            |       |      |          |
|------------|-------|------|----------|
| rs16936269 | 21.21 | 1.04 | 7.07E-05 |
| rs16936267 | 21.21 | 1.04 | 7.07E-05 |
| rs11848    | 2.98  | 0.30 | 7.12E-05 |
| rs10821352 | 6.66  | 0.55 | 7.23E-05 |
| rs6594760  | 2.25  | 0.21 | 7.32E-05 |
| rs2168002  | 2.25  | 0.21 | 7.32E-05 |
| rs3803071  | 0.43  | 0.21 | 7.38E-05 |
| rs6786606  | 2.73  | 0.26 | 7.42E-05 |
| rs4320303  | 2.25  | 0.21 | 7.43E-05 |
| rs7555699  | 2.31  | 0.21 | 7.45E-05 |
| rs2275767  | 2.32  | 0.22 | 7.49E-05 |
| rs2369754  | 2.25  | 0.21 | 7.50E-05 |
| rs4712500  | 4.00  | 0.38 | 7.50E-05 |
| rs2987202  | 5.93  | 0.52 | 7.85E-05 |
| rs11154722 | 3.27  | 0.32 | 7.90E-05 |
| rs5011374  | 2.39  | 0.22 | 7.91E-05 |
| rs12623026 | 2.37  | 0.22 | 8.07E-05 |
| rs9531002  | 2.37  | 0.22 | 8.16E-05 |
| rs1867115  | 3.17  | 0.31 | 8.25E-05 |
| rs5992403  | 2.26  | 0.21 | 8.52E-05 |
| rs1565078  | 2.36  | 0.22 | 8.56E-05 |
| rs4978629  | 2.38  | 0.23 | 8.62E-05 |
| rs7576895  | 2.36  | 0.22 | 8.70E-05 |
| rs8003722  | 2.95  | 0.29 | 8.85E-05 |
| rs9546538  | 0.35  | 0.27 | 8.92E-05 |
| rs927987   | 0.39  | 0.24 | 8.98E-05 |
| rs4415146  | 2.33  | 0.22 | 8.98E-05 |
| GA022530   | 2.46  | 0.24 | 9.01E-05 |
| rs1029845  | 2.38  | 0.23 | 9.05E-05 |
| rs2893113  | 6.06  | 0.52 | 9.07E-05 |
| rs5746742  | 2.25  | 0.21 | 9.11E-05 |
| rs10510535 | 3.99  | 0.39 | 9.12E-05 |
| rs9902073  | 6.03  | 0.54 | 9.14E-05 |
| rs458975   | 2.49  | 0.24 | 9.17E-05 |
| rs9593835  | 0.35  | 0.27 | 9.26E-05 |
| rs7784717  | 2.40  | 0.23 | 9.51E-05 |
| rs3118752  | 6.34  | 0.56 | 9.60E-05 |

S3 Table (b). AA GWIS Associations with  $P < 1 \times 10^{-4}$  in primary model (race, sex, and principal component adjusted)

| SNP        | Odds Ratio | SE   | P        |
|------------|------------|------|----------|
| rs13389599 | 22.26      | 1.41 | 7.76E-11 |
| rs9567406  | 68.32      | 2.55 | 2.10E-10 |
| rs1638665  | 506.92     | 8.19 | 1.04E-09 |
| rs634138   | 6.10       | 0.64 | 5.46E-09 |
| rs10979314 | 347.30     | 3.98 | 1.01E-08 |
| rs3755899  | 1789.83    | 8.73 | 2.24E-08 |
| rs2161719  | 5.76       | 0.42 | 3.81E-08 |
| rs2989314  | 9.79       | 0.67 | 4.20E-08 |
| rs9940555  | 7.72       | 0.51 | 4.49E-08 |
| rs11206019 | 43.78      | 1.35 | 5.39E-08 |
| rs12335314 | 5.91       | 0.70 | 5.39E-08 |
| rs10046574 | 17.77      | 0.89 | 7.86E-08 |
| rs9397365  | 21.07      | 0.76 | 8.05E-08 |
| rs11190074 | 7.36       | 0.62 | 9.44E-08 |
| rs10484876 | 45.75      | 1.27 | 9.94E-08 |
| rs6570628  | 21.77      | 0.80 | 1.20E-07 |
| rs7787478  | 7.92       | 0.57 | 1.60E-07 |
| rs17143122 | 807.55     | 5.69 | 1.90E-07 |

|            |         |      |          |
|------------|---------|------|----------|
| rs499832   | 6.66    | 0.48 | 1.96E-07 |
| rs11466653 | 78.65   | 4.55 | 2.28E-07 |
| rs17019537 | 9.51    | 0.79 | 3.65E-07 |
| rs2073300  | 12.35   | 0.97 | 3.76E-07 |
| rs28667979 | 23.79   | 0.79 | 4.19E-07 |
| rs4547347  | 126.36  | 2.20 | 4.65E-07 |
| rs7022762  | 17.57   | 0.75 | 4.67E-07 |
| rs7860288  | 17.57   | 0.75 | 4.67E-07 |
| rs9367486  | 46.78   | 1.33 | 4.96E-07 |
| rs736088   | 67.20   | 1.69 | 5.22E-07 |
| rs9824246  | 6.20    | 0.52 | 5.78E-07 |
| rs11077983 | 5.30    | 0.45 | 6.36E-07 |
| rs16944118 | 6.49    | 0.50 | 6.56E-07 |
| rs9557207  | 31.19   | 1.05 | 6.79E-07 |
| rs16855732 | 22.59   | 1.05 | 7.09E-07 |
| rs11942139 | 20.86   | 1.01 | 7.16E-07 |
| rs9356334  | 87.33   | 2.10 | 7.26E-07 |
| rs12445943 | 6.26    | 0.46 | 8.01E-07 |
| rs11512640 | 30.22   | 1.18 | 8.65E-07 |
| rs10428206 | 29.80   | 1.25 | 9.59E-07 |
| rs11220138 | 31.08   | 1.19 | 9.78E-07 |
| rs11819158 | 8.05    | 0.79 | 9.83E-07 |
| rs1539189  | 7.35    | 0.68 | 1.01E-06 |
| rs11039100 | 71.94   | 1.82 | 1.07E-06 |
| rs9747201  | 5.21    | 0.45 | 1.08E-06 |
| rs6698723  | 4.82    | 0.44 | 1.14E-06 |
| rs7046999  | 6.15    | 0.62 | 1.15E-06 |
| rs16837982 | 20.37   | 0.99 | 1.18E-06 |
| rs10467515 | 35.43   | 1.10 | 1.23E-06 |
| rs9596720  | 35.15   | 1.11 | 1.41E-06 |
| rs12257301 | 6.19    | 0.45 | 1.45E-06 |
| rs2056389  | 10.39   | 0.63 | 1.52E-06 |
| rs10039526 | 13.42   | 0.74 | 1.61E-06 |
| rs750723   | 120.26  | 4.84 | 1.64E-06 |
| rs11209878 | 6.00    | 0.71 | 1.69E-06 |
| rs6909762  | 57.27   | 1.68 | 1.72E-06 |
| rs234284   | 17.97   | 0.81 | 1.73E-06 |
| rs1846413  | 5.18    | 0.53 | 1.75E-06 |
| rs4239020  | 5.09    | 0.45 | 1.75E-06 |
| rs1735894  | 5.39    | 0.47 | 1.94E-06 |
| rs242423   | 6.72    | 0.60 | 1.97E-06 |
| rs6748245  | 51.10   | 1.36 | 1.99E-06 |
| rs962073   | 6.08    | 0.59 | 2.02E-06 |
| rs9600550  | 34.12   | 1.04 | 2.06E-06 |
| rs17391705 | 50.12   | 1.32 | 2.10E-06 |
| rs10508774 | 11.55   | 0.69 | 2.15E-06 |
| rs16914101 | 4.90    | 0.44 | 2.24E-06 |
| rs4798730  | 1764.85 | 3.52 | 2.30E-06 |
| rs1912124  | 118.90  | 1.95 | 2.30E-06 |
| rs11012350 | 5.11    | 0.52 | 2.31E-06 |
| rs8121203  | 27.57   | 1.07 | 2.34E-06 |
| rs1451882  | 14.73   | 0.90 | 2.37E-06 |
| rs13147122 | 25.73   | 1.19 | 2.69E-06 |
| rs1960306  | 5.15    | 0.53 | 2.82E-06 |
| rs16919174 | 116.97  | 2.09 | 2.82E-06 |
| rs2592394  | 5.66    | 0.44 | 2.87E-06 |
| rs10196592 | 46.63   | 1.64 | 2.88E-06 |

|            |         |      |          |
|------------|---------|------|----------|
| rs4134872  | 15.74   | 0.80 | 2.98E-06 |
| rs10508336 | 49.17   | 1.42 | 3.04E-06 |
| rs2431703  | 23.46   | 1.24 | 3.07E-06 |
| rs4757882  | 6.53    | 0.54 | 3.17E-06 |
| rs10507495 | 13.68   | 0.86 | 3.20E-06 |
| rs11771793 | 4.64    | 0.39 | 3.22E-06 |
| rs10421078 | 26.09   | 1.03 | 3.27E-06 |
| rs720844   | 4.33    | 0.38 | 3.32E-06 |
| rs11827555 | 4.84    | 0.56 | 3.56E-06 |
| rs9304301  | 18.99   | 0.94 | 3.91E-06 |
| rs16965478 | 5.32    | 0.52 | 3.92E-06 |
| rs12056645 | 5.18    | 0.45 | 4.13E-06 |
| rs10129758 | 5.48    | 0.49 | 4.15E-06 |
| rs11622263 | 194.87  | 4.64 | 4.27E-06 |
| rs2281558  | 4.64    | 0.39 | 4.42E-06 |
| rs12704294 | 6698.82 | 9.11 | 4.47E-06 |
| rs615026   | 16.08   | 0.98 | 4.50E-06 |
| rs12175863 | 23.28   | 1.27 | 4.51E-06 |
| rs17307778 | 17.81   | 1.10 | 4.56E-06 |
| rs11990843 | 5.26    | 0.48 | 4.57E-06 |
| rs7295749  | 4.45    | 0.50 | 4.72E-06 |
| rs16892422 | 8.76    | 0.72 | 4.96E-06 |
| rs660323   | 5.58    | 0.44 | 5.09E-06 |
| rs1450667  | 198.60  | 5.12 | 5.34E-06 |
| rs256811   | 3.87    | 0.39 | 5.44E-06 |
| rs11596966 | 78.49   | 1.58 | 5.51E-06 |
| rs17064440 | 5.78    | 0.63 | 5.60E-06 |
| rs16832236 | 18.32   | 1.06 | 5.67E-06 |
| rs1027896  | 20.58   | 1.12 | 5.70E-06 |
| rs1684978  | 3.91    | 0.38 | 5.83E-06 |
| rs4897936  | 15.79   | 1.06 | 5.96E-06 |
| rs6678735  | 5.76    | 0.69 | 6.08E-06 |
| rs10115371 | 5.92    | 0.43 | 6.15E-06 |
| rs17429538 | 37.08   | 1.18 | 6.33E-06 |
| rs12777098 | 19.14   | 1.02 | 6.35E-06 |
| rs4789729  | 4.31    | 0.40 | 6.37E-06 |
| rs225872   | 23.61   | 1.18 | 6.39E-06 |
| rs17725600 | 12.73   | 0.85 | 6.49E-06 |
| rs1832987  | 47.27   | 1.66 | 6.49E-06 |
| rs4669572  | 5.47    | 0.47 | 6.54E-06 |
| rs10134584 | 5.23    | 0.49 | 6.80E-06 |
| rs17130391 | 19.63   | 0.97 | 6.99E-06 |
| rs1250309  | 10.35   | 0.63 | 7.02E-06 |
| rs1786426  | 5.08    | 0.57 | 7.04E-06 |
| rs3858306  | 5.11    | 0.43 | 7.19E-06 |
| rs17037831 | 4.72    | 0.46 | 7.20E-06 |
| rs6537319  | 12.57   | 0.85 | 7.29E-06 |
| rs8020981  | 13.71   | 1.08 | 7.38E-06 |
| rs12024301 | 5.05    | 0.57 | 7.56E-06 |
| rs8073525  | 14.10   | 0.88 | 7.71E-06 |
| rs9784649  | 14.32   | 0.75 | 7.93E-06 |
| rs3905000  | 5.00    | 0.44 | 7.96E-06 |
| rs9382099  | 25.29   | 1.24 | 8.36E-06 |
| rs11971803 | 5.57    | 0.53 | 8.53E-06 |
| rs12038357 | 33.51   | 1.11 | 8.57E-06 |
| rs7982202  | 6.73    | 0.70 | 8.59E-06 |
| rs16962242 | 18.29   | 0.88 | 8.62E-06 |

|            |        |      |          |
|------------|--------|------|----------|
| rs13335729 | 4.43   | 0.39 | 8.93E-06 |
| rs6957127  | 10.31  | 0.80 | 8.94E-06 |
| rs11605275 | 6.16   | 0.65 | 9.00E-06 |
| rs13257525 | 4.07   | 0.37 | 9.15E-06 |
| rs1593415  | 17.58  | 1.10 | 9.16E-06 |
| rs1798817  | 4.89   | 0.51 | 9.29E-06 |
| rs3219474  | 8.16   | 0.73 | 9.42E-06 |
| rs6127146  | 24.00  | 1.12 | 9.58E-06 |
| rs16981522 | 549.41 | 5.64 | 9.69E-06 |
| rs4596377  | 36.12  | 1.39 | 9.75E-06 |
| rs34717587 | 25.14  | 1.25 | 9.83E-06 |
| rs17233103 | 22.75  | 1.26 | 1.00E-05 |
| rs9365409  | 169.43 | 3.16 | 1.02E-05 |
| rs12807369 | 5.90   | 0.50 | 1.04E-05 |
| rs672095   | 10.37  | 0.66 | 1.05E-05 |
| rs711825   | 5.09   | 0.43 | 1.09E-05 |
| rs7905504  | 10.01  | 0.82 | 1.11E-05 |
| rs3181225  | 4.23   | 0.47 | 1.11E-05 |
| rs7232985  | 3.99   | 0.44 | 1.12E-05 |
| rs11022114 | 13.01  | 0.71 | 1.13E-05 |
| rs12247913 | 4.00   | 0.47 | 1.13E-05 |
| rs10117316 | 27.46  | 1.36 | 1.15E-05 |
| rs7830816  | 4.51   | 0.41 | 1.15E-05 |
| rs16832352 | 21.84  | 1.17 | 1.17E-05 |
| rs10819779 | 38.62  | 1.50 | 1.18E-05 |
| rs188750   | 7.99   | 0.59 | 1.20E-05 |
| rs7901466  | 12.05  | 0.69 | 1.21E-05 |
| rs10131663 | 4.18   | 0.39 | 1.26E-05 |
| rs17147740 | 7.93   | 0.65 | 1.30E-05 |
| rs2510157  | 4.09   | 0.43 | 1.31E-05 |
| rs12605132 | 23.13  | 1.05 | 1.33E-05 |
| rs11915226 | 5.06   | 0.59 | 1.38E-05 |
| rs7970417  | 8.46   | 0.57 | 1.41E-05 |
| rs16975650 | 7.41   | 0.56 | 1.45E-05 |
| rs6254     | 21.07  | 0.98 | 1.47E-05 |
| rs2569254  | 4.17   | 0.47 | 1.48E-05 |
| rs2391106  | 4.30   | 0.47 | 1.49E-05 |
| rs9477218  | 49.21  | 1.44 | 1.51E-05 |
| rs7605628  | 11.74  | 0.69 | 1.52E-05 |
| rs6980740  | 3.80   | 0.43 | 1.54E-05 |
| rs9481643  | 14.67  | 0.84 | 1.55E-05 |
| rs12410212 | 42.86  | 1.53 | 1.56E-05 |
| rs1055970  | 4.52   | 0.46 | 1.60E-05 |
| rs7185036  | 3.99   | 0.38 | 1.61E-05 |
| rs4919017  | 10.16  | 0.68 | 1.63E-05 |
| rs9622495  | 5.20   | 0.52 | 1.63E-05 |
| rs17836804 | 11.01  | 0.65 | 1.63E-05 |
| rs17139138 | 6.57   | 0.49 | 1.69E-05 |
| rs16910400 | 4.83   | 0.52 | 1.71E-05 |
| rs7873053  | 4.56   | 0.39 | 1.74E-05 |
| rs12056981 | 47.07  | 1.59 | 1.75E-05 |
| rs497022   | 10.55  | 0.66 | 1.75E-05 |
| rs17125553 | 4.68   | 0.46 | 1.76E-05 |
| rs7093355  | 4.27   | 0.44 | 1.76E-05 |
| rs13259685 | 4.32   | 0.38 | 1.77E-05 |
| rs4752066  | 4.30   | 0.48 | 1.78E-05 |
| rs16891597 | 4.67   | 0.46 | 1.78E-05 |

|            |         |      |          |
|------------|---------|------|----------|
| rs4714513  | 4.68    | 0.40 | 1.81E-05 |
| rs10401645 | 10.91   | 0.69 | 1.83E-05 |
| rs239027   | 3.74    | 0.37 | 1.85E-05 |
| rs11815171 | 4.78    | 0.49 | 1.90E-05 |
| rs6142859  | 55.02   | 1.53 | 1.91E-05 |
| rs12137842 | 1749.84 | 5.49 | 1.91E-05 |
| rs17148284 | 4.87    | 0.51 | 1.91E-05 |
| rs10138933 | 4.94    | 0.49 | 1.93E-05 |
| rs6685359  | 16.62   | 0.82 | 1.97E-05 |
| rs12079836 | 4.26    | 0.42 | 1.97E-05 |
| rs6830548  | 4.41    | 0.48 | 2.01E-05 |
| rs11618570 | 4.06    | 0.40 | 2.03E-05 |
| rs4368817  | 12.29   | 0.85 | 2.04E-05 |
| rs17135409 | 3.84    | 0.43 | 2.04E-05 |
| rs6713543  | 70.21   | 1.58 | 2.06E-05 |
| rs9365855  | 18.16   | 1.09 | 2.07E-05 |
| rs7316303  | 4.49    | 0.48 | 2.07E-05 |
| rs17081017 | 13.73   | 0.78 | 2.10E-05 |
| rs2986737  | 11.48   | 0.75 | 2.11E-05 |
| rs4605886  | 5.51    | 0.55 | 2.13E-05 |
| rs9819495  | 142.60  | 2.72 | 2.13E-05 |
| rs4721648  | 0.18    | 0.45 | 2.15E-05 |
| rs16856762 | 1008.42 | 5.37 | 2.21E-05 |
| rs7207191  | 20.68   | 1.05 | 2.29E-05 |
| rs9554568  | 15.43   | 0.86 | 2.30E-05 |
| rs12541465 | 4.13    | 0.40 | 2.30E-05 |
| rs693978   | 5.38    | 0.42 | 2.31E-05 |
| rs1550558  | 5.37    | 0.45 | 2.31E-05 |
| rs17047453 | 9.49    | 0.63 | 2.32E-05 |
| rs6697084  | 9.47    | 0.65 | 2.33E-05 |
| rs1112868  | 34.81   | 1.18 | 2.35E-05 |
| rs10827150 | 10.59   | 0.76 | 2.40E-05 |
| rs11646066 | 5.41    | 0.44 | 2.42E-05 |
| rs35486143 | 43.13   | 4.57 | 2.42E-05 |
| rs4134901  | 29.27   | 1.38 | 2.43E-05 |
| rs2171475  | 19.18   | 0.90 | 2.43E-05 |
| rs919953   | 4.57    | 0.46 | 2.52E-05 |
| rs13283256 | 6.42    | 0.68 | 2.56E-05 |
| rs9557176  | 15.33   | 0.86 | 2.58E-05 |
| rs16965676 | 22.36   | 0.96 | 2.58E-05 |
| rs3181718  | 15.49   | 0.87 | 2.59E-05 |
| rs17469385 | 11.26   | 0.93 | 2.60E-05 |
| rs9633677  | 11.20   | 0.73 | 2.65E-05 |
| rs17070056 | 5.41    | 0.61 | 2.66E-05 |
| rs12528404 | 8.05    | 0.69 | 2.67E-05 |
| rs7980687  | 4.22    | 0.39 | 2.69E-05 |
| rs901720   | 5.73    | 0.47 | 2.69E-05 |
| rs11793044 | 4.94    | 0.47 | 2.70E-05 |
| rs11794668 | 4.94    | 0.47 | 2.70E-05 |
| rs9866608  | 6.43    | 0.52 | 2.71E-05 |
| rs952932   | 19.19   | 1.04 | 2.72E-05 |
| rs16868737 | 7.31    | 0.56 | 2.72E-05 |
| rs17025036 | 4.38    | 0.46 | 2.75E-05 |
| rs9451860  | 25.40   | 1.14 | 2.77E-05 |
| rs10018408 | 113.41  | 2.12 | 2.78E-05 |
| GA009992   | 4.51    | 0.43 | 2.79E-05 |
| rs7563103  | 5.09    | 0.45 | 2.80E-05 |

|            |        |      |          |
|------------|--------|------|----------|
| rs12166034 | 7.64   | 0.62 | 2.86E-05 |
| rs6596257  | 4.58   | 0.44 | 2.87E-05 |
| rs6605557  | 15.23  | 0.99 | 2.92E-05 |
| rs16904171 | 17.64  | 1.02 | 2.92E-05 |
| rs2252430  | 11.15  | 0.77 | 2.95E-05 |
| rs9960486  | 4.65   | 0.53 | 2.95E-05 |
| rs16830097 | 3.64   | 0.40 | 2.98E-05 |
| rs716478   | 105.95 | 2.00 | 2.99E-05 |
| rs1342760  | 22.66  | 0.97 | 2.99E-05 |
| rs10817051 | 11.98  | 0.79 | 3.00E-05 |
| rs3750036  | 4.22   | 0.44 | 3.01E-05 |
| rs1908750  | 4.73   | 0.66 | 3.01E-05 |
| rs16965811 | 5.14   | 0.63 | 3.02E-05 |
| rs17049741 | 4.64   | 0.58 | 3.06E-05 |
| rs2275544  | 4.62   | 0.44 | 3.09E-05 |
| rs12306432 | 8.04   | 0.57 | 3.09E-05 |
| rs7195194  | 3.90   | 0.37 | 3.10E-05 |
| rs4414501  | 3.90   | 0.37 | 3.10E-05 |
| rs7677523  | 10.80  | 0.75 | 3.14E-05 |
| rs1392372  | 21.80  | 1.18 | 3.18E-05 |
| rs720840   | 10.25  | 0.68 | 3.22E-05 |
| rs4943266  | 5.56   | 0.59 | 3.22E-05 |
| rs11827197 | 11.25  | 0.74 | 3.23E-05 |
| rs2929566  | 4.69   | 0.40 | 3.28E-05 |
| rs7200988  | 10.67  | 0.67 | 3.29E-05 |
| rs6913042  | 11.25  | 0.65 | 3.29E-05 |
| rs10106404 | 11.20  | 0.75 | 3.30E-05 |
| rs131992   | 4.62   | 0.42 | 3.32E-05 |
| rs1372202  | 10.32  | 0.70 | 3.32E-05 |
| rs17018642 | 80.56  | 2.05 | 3.33E-05 |
| rs39986    | 3.43   | 0.38 | 3.39E-05 |
| rs12640471 | 15.26  | 1.00 | 3.39E-05 |
| rs7803922  | 4.32   | 0.40 | 3.40E-05 |
| rs8093814  | 4.25   | 0.58 | 3.40E-05 |
| rs9853287  | 10.97  | 0.76 | 3.40E-05 |
| rs218237   | 4.05   | 0.37 | 3.43E-05 |
| rs35779182 | 21.07  | 1.06 | 3.44E-05 |
| rs2382882  | 4.29   | 0.47 | 3.46E-05 |
| rs10989164 | 68.84  | 1.91 | 3.50E-05 |
| rs10989163 | 68.84  | 1.91 | 3.50E-05 |
| rs16919211 | 68.84  | 1.91 | 3.50E-05 |
| rs7030223  | 4.00   | 0.42 | 3.51E-05 |
| rs12786876 | 5.14   | 0.52 | 3.54E-05 |
| rs6564716  | 4.58   | 0.48 | 3.58E-05 |
| rs10190087 | 8.56   | 0.62 | 3.60E-05 |
| rs749822   | 18.25  | 1.20 | 3.62E-05 |
| rs7989565  | 80.17  | 1.78 | 3.62E-05 |
| rs17065076 | 6.78   | 0.54 | 3.63E-05 |
| rs17806552 | 21.14  | 1.17 | 3.64E-05 |
| rs405031   | 4.50   | 0.40 | 3.64E-05 |
| rs10026033 | 7.63   | 0.60 | 3.65E-05 |
| rs1732519  | 5.03   | 0.42 | 3.66E-05 |
| rs17168377 | 9.38   | 0.67 | 3.67E-05 |
| rs10989165 | 69.03  | 1.92 | 3.70E-05 |
| rs1810494  | 33.18  | 3.86 | 3.73E-05 |
| rs7261777  | 4.62   | 0.43 | 3.74E-05 |
| rs7935954  | 11.02  | 0.73 | 3.75E-05 |



|            |       |      |          |
|------------|-------|------|----------|
| rs11109007 | 19.34 | 1.07 | 3.75E-05 |
| rs4837752  | 3.62  | 0.38 | 3.80E-05 |
| rs17064584 | 5.64  | 0.59 | 3.88E-05 |
| rs6725219  | 13.83 | 0.95 | 3.88E-05 |
| rs7339053  | 12.18 | 0.72 | 3.92E-05 |
| rs9396245  | 8.92  | 0.62 | 3.94E-05 |
| rs9464413  | 8.96  | 0.62 | 3.95E-05 |
| rs1796306  | 10.32 | 0.73 | 4.00E-05 |
| rs8025995  | 4.91  | 0.61 | 4.00E-05 |
| rs28496502 | 3.91  | 0.37 | 4.01E-05 |
| rs7768646  | 11.36 | 0.81 | 4.02E-05 |
| rs6057126  | 5.54  | 0.50 | 4.02E-05 |
| rs1873380  | 12.31 | 0.93 | 4.05E-05 |
| rs11602119 | 27.07 | 1.43 | 4.05E-05 |
| rs1790935  | 4.62  | 0.47 | 4.07E-05 |
| rs17121644 | 16.57 | 1.06 | 4.08E-05 |
| rs10829791 | 3.95  | 0.41 | 4.10E-05 |
| rs973954   | 4.02  | 0.43 | 4.19E-05 |
| rs7655674  | 7.55  | 0.55 | 4.27E-05 |
| rs6964936  | 4.15  | 0.44 | 4.28E-05 |
| rs10204846 | 30.90 | 1.20 | 4.31E-05 |
| rs10183184 | 30.90 | 1.20 | 4.31E-05 |
| rs225475   | 3.84  | 0.44 | 4.31E-05 |
| rs2977552  | 4.10  | 0.43 | 4.31E-05 |
| rs10978077 | 4.69  | 0.44 | 4.32E-05 |
| rs12813784 | 4.27  | 0.46 | 4.38E-05 |
| rs17058330 | 4.99  | 0.52 | 4.44E-05 |
| rs17156888 | 4.92  | 0.47 | 4.45E-05 |
| rs28539472 | 3.90  | 0.37 | 4.46E-05 |
| rs17473999 | 11.25 | 0.71 | 4.47E-05 |
| rs17123327 | 14.33 | 0.93 | 4.47E-05 |
| rs1488831  | 8.31  | 0.59 | 4.48E-05 |
| rs7315359  | 4.08  | 0.40 | 4.48E-05 |
| rs17142071 | 5.03  | 0.44 | 4.53E-05 |
| rs12929663 | 4.45  | 0.54 | 4.57E-05 |
| rs35987    | 7.23  | 0.63 | 4.57E-05 |
| rs7185877  | 3.89  | 0.37 | 4.58E-05 |
| rs11207307 | 12.15 | 0.76 | 4.60E-05 |
| rs7974564  | 6.32  | 0.50 | 4.63E-05 |
| rs8133734  | 7.18  | 0.61 | 4.63E-05 |
| rs12915512 | 9.52  | 0.67 | 4.64E-05 |
| rs17043519 | 13.30 | 0.83 | 4.70E-05 |
| rs7314345  | 3.89  | 0.46 | 4.71E-05 |
| rs34509814 | 8.96  | 0.67 | 4.72E-05 |
| rs4436527  | 4.75  | 0.45 | 4.77E-05 |
| rs7580068  | 10.67 | 0.77 | 4.81E-05 |
| rs6905338  | 9.69  | 0.66 | 4.82E-05 |
| rs16852893 | 6.60  | 0.65 | 4.85E-05 |
| rs12769955 | 11.40 | 0.70 | 4.85E-05 |
| rs11874308 | 3.69  | 0.38 | 4.86E-05 |
| rs9448502  | 24.86 | 1.21 | 4.89E-05 |
| rs12906810 | 10.71 | 0.67 | 4.89E-05 |
| rs10835254 | 14.38 | 0.93 | 4.92E-05 |
| rs16903467 | 17.30 | 1.05 | 4.97E-05 |
| rs4134885  | 24.58 | 1.36 | 5.01E-05 |
| rs12080418 | 18.74 | 1.09 | 5.02E-05 |
| rs10860653 | 4.45  | 0.39 | 5.04E-05 |

|            |         |      |          |
|------------|---------|------|----------|
| rs16953011 | 21.50   | 1.03 | 5.06E-05 |
| rs4948722  | 13.42   | 0.88 | 5.11E-05 |
| rs17148598 | 7.45    | 0.56 | 5.12E-05 |
| rs12598809 | 3.73    | 0.36 | 5.13E-05 |
| rs13118169 | 8.84    | 0.67 | 5.15E-05 |
| rs13141109 | 4.15    | 0.44 | 5.16E-05 |
| rs6103601  | 4.13    | 0.43 | 5.18E-05 |
| rs7164310  | 4.86    | 0.61 | 5.18E-05 |
| rs10190810 | 17.57   | 0.92 | 5.19E-05 |
| rs8064257  | 8.60    | 0.67 | 5.21E-05 |
| rs9821348  | 15.06   | 0.99 | 5.25E-05 |
| rs10001567 | 9.79    | 0.72 | 5.27E-05 |
| rs10189905 | 3.76    | 0.39 | 5.29E-05 |
| rs16941207 | 10.30   | 0.67 | 5.32E-05 |
| rs7701189  | 4.62    | 0.54 | 5.33E-05 |
| rs6789607  | 5.20    | 0.42 | 5.38E-05 |
| rs7323678  | 4.54    | 0.49 | 5.40E-05 |
| rs146250   | 3.97    | 0.43 | 5.41E-05 |
| rs10002434 | 20.23   | 1.16 | 5.49E-05 |
| rs665974   | 4.48    | 0.41 | 5.52E-05 |
| rs2243133  | 16.67   | 1.14 | 5.53E-05 |
| rs1054191  | 4.41    | 0.44 | 5.55E-05 |
| rs6677436  | 4.54    | 0.39 | 5.56E-05 |
| rs10405323 | 13.85   | 0.80 | 5.58E-05 |
| rs10181159 | 17.00   | 1.05 | 5.61E-05 |
| rs12574588 | 33.27   | 1.23 | 5.68E-05 |
| rs10094712 | 10.74   | 0.80 | 5.76E-05 |
| rs1203814  | 4.14    | 0.37 | 5.77E-05 |
| rs3806708  | 1010.60 | 6.12 | 5.79E-05 |
| rs13384377 | 3095.92 | 7.26 | 5.80E-05 |
| rs10408321 | 6.55    | 0.69 | 5.83E-05 |
| rs13275996 | 62.68   | 1.98 | 5.89E-05 |
| rs17853024 | 13.12   | 0.73 | 5.98E-05 |
| rs8973     | 4.59    | 0.53 | 6.00E-05 |
| rs9394969  | 4.86    | 0.42 | 6.04E-05 |
| rs7109515  | 12.33   | 0.93 | 6.08E-05 |
| rs11890391 | 17.81   | 1.08 | 6.10E-05 |
| rs6510902  | 3.97    | 0.45 | 6.11E-05 |
| rs10218979 | 11.50   | 0.83 | 6.20E-05 |
| rs7590083  | 17.65   | 0.93 | 6.21E-05 |
| rs519800   | 3.98    | 0.49 | 6.22E-05 |
| rs12419635 | 21.04   | 1.06 | 6.23E-05 |
| rs725378   | 8.46    | 0.60 | 6.27E-05 |
| rs17156890 | 4.57    | 0.46 | 6.31E-05 |
| rs10947929 | 4.21    | 0.40 | 6.31E-05 |
| rs1567318  | 3.65    | 0.38 | 6.34E-05 |
| rs2014220  | 4.50    | 0.39 | 6.35E-05 |
| rs10767711 | 13.26   | 0.92 | 6.36E-05 |
| rs936115   | 14.39   | 0.82 | 6.37E-05 |
| rs1378683  | 14.39   | 0.82 | 6.37E-05 |
| rs1013870  | 20.16   | 1.23 | 6.43E-05 |
| rs10497760 | 4.00    | 0.44 | 6.48E-05 |
| rs9833934  | 11.40   | 0.77 | 6.50E-05 |
| rs328489   | 9.97    | 0.76 | 6.50E-05 |
| rs7730356  | 14.56   | 0.93 | 6.51E-05 |
| rs6420969  | 4.21    | 0.53 | 6.52E-05 |
| rs17129022 | 11.09   | 1.05 | 6.52E-05 |

|            |            |      |          |
|------------|------------|------|----------|
| rs7070481  | 4.23       | 0.45 | 6.55E-05 |
| rs11245253 | 4.85       | 0.60 | 6.59E-05 |
| rs2048917  | 4.25       | 0.40 | 6.61E-05 |
| rs6430220  | 8.68       | 0.63 | 6.80E-05 |
| rs16838840 | 6.29       | 0.55 | 6.81E-05 |
| rs9809539  | 20.75      | 1.12 | 6.84E-05 |
| rs11841493 | 4.19       | 0.40 | 6.84E-05 |
| rs3741595  | 11.13      | 1.01 | 6.84E-05 |
| rs907795   | 10.75      | 0.69 | 6.85E-05 |
| rs2243411  | 8.15       | 0.59 | 6.86E-05 |
| rs16923623 | 9.54       | 0.64 | 6.86E-05 |
| rs4238255  | 4.04       | 0.42 | 6.87E-05 |
| rs4910297  | 4.21       | 0.39 | 6.96E-05 |
| rs4771953  | 11.18      | 0.70 | 6.97E-05 |
| rs9879165  | 15.97      | 0.96 | 6.97E-05 |
| rs10031329 | 9.46       | 0.63 | 7.07E-05 |
| rs10178114 | 12.60      | 0.96 | 7.07E-05 |
| rs12761309 | 12.74      | 0.85 | 7.11E-05 |
| rs717958   | 12.26      | 0.83 | 7.19E-05 |
| rs6792417  | 4.15       | 0.42 | 7.21E-05 |
| rs16830291 | 4.15       | 0.42 | 7.21E-05 |
| rs13421180 | 4.16       | 0.42 | 7.23E-05 |
| rs571847   | 3.81       | 0.36 | 7.26E-05 |
| rs222732   | 0.23       | 0.39 | 7.27E-05 |
| rs7995134  | 4.71       | 0.56 | 7.28E-05 |
| rs7724962  | 3.49       | 0.40 | 7.35E-05 |
| rs12268694 | 26.82      | 1.42 | 7.37E-05 |
| rs2339798  | 3.76       | 0.45 | 7.40E-05 |
| rs6464215  | 4.29       | 0.39 | 7.45E-05 |
| rs623899   | 57.09      | 1.67 | 7.46E-05 |
| rs12247544 | 4.70       | 0.48 | 7.46E-05 |
| rs6916164  | 1422138.32 | 9.96 | 7.47E-05 |
| rs10159109 | 37.47      | 1.57 | 7.48E-05 |
| rs589216   | 4.13       | 0.41 | 7.49E-05 |
| rs2172011  | 4.27       | 0.43 | 7.51E-05 |
| rs1017781  | 3.47       | 0.38 | 7.53E-05 |
| rs7920114  | 3.94       | 0.37 | 7.56E-05 |
| rs4147819  | 12.16      | 0.74 | 7.57E-05 |
| rs28382829 | 20.09      | 1.23 | 7.58E-05 |
| rs12047483 | 10.77      | 0.77 | 7.64E-05 |
| rs9328707  | 3.86       | 0.37 | 7.64E-05 |
| rs1790937  | 4.65       | 0.44 | 7.69E-05 |
| rs9304276  | 4.42       | 0.51 | 7.72E-05 |
| rs17109605 | 3.99       | 0.41 | 7.72E-05 |
| rs12059484 | 4.17       | 0.43 | 7.77E-05 |
| rs953221   | 307.72     | 7.55 | 7.78E-05 |
| rs6815792  | 16.89      | 1.11 | 7.78E-05 |
| rs2516698  | 4.00       | 0.43 | 7.79E-05 |
| rs9582496  | 14.38      | 0.80 | 7.82E-05 |
| rs7861556  | 4.21       | 0.41 | 7.86E-05 |
| rs9365411  | 4.41       | 0.44 | 7.87E-05 |
| rs12207132 | 5.48       | 0.69 | 7.87E-05 |
| rs17039638 | 12.80      | 0.85 | 7.95E-05 |
| rs35142427 | 4.30       | 0.42 | 7.95E-05 |
| rs686784   | 4.55       | 0.44 | 7.97E-05 |
| rs12458041 | 8.44       | 0.63 | 8.03E-05 |
| rs1265045  | 3.23       | 0.35 | 8.05E-05 |

|            |        |      |          |
|------------|--------|------|----------|
| rs10021155 | 20.81  | 1.18 | 8.05E-05 |
| rs28588913 | 9.55   | 0.66 | 8.06E-05 |
| rs16976904 | 13.62  | 0.84 | 8.08E-05 |
| rs17138263 | 4.46   | 0.49 | 8.09E-05 |
| rs7902671  | 14.25  | 0.88 | 8.10E-05 |
| rs3787309  | 4.69   | 0.41 | 8.11E-05 |
| rs17148743 | 8.39   | 0.61 | 8.11E-05 |
| rs2389672  | 4.20   | 0.44 | 8.19E-05 |
| rs1055160  | 4.03   | 0.41 | 8.21E-05 |
| rs7301563  | 11.61  | 0.93 | 8.24E-05 |
| rs163253   | 7.81   | 0.62 | 8.25E-05 |
| rs7543809  | 8.00   | 0.61 | 8.27E-05 |
| rs4567801  | 5.98   | 0.51 | 8.29E-05 |
| rs11466648 | 7.91   | 0.65 | 8.32E-05 |
| rs11466659 | 7.91   | 0.65 | 8.32E-05 |
| rs9328420  | 8.75   | 0.68 | 8.35E-05 |
| rs4831658  | 4.66   | 0.48 | 8.36E-05 |
| rs10173820 | 4.07   | 0.39 | 8.37E-05 |
| rs327475   | 18.63  | 1.15 | 8.38E-05 |
| rs6989222  | 6.81   | 0.56 | 8.40E-05 |
| rs6755656  | 12.54  | 0.78 | 8.43E-05 |
| rs10252263 | 4.34   | 0.40 | 8.43E-05 |
| rs11912074 | 3.30   | 0.35 | 8.44E-05 |
| rs12813801 | 4.13   | 0.46 | 8.47E-05 |
| rs1527087  | 4.29   | 0.50 | 8.49E-05 |
| rs11773898 | 5.38   | 0.54 | 8.55E-05 |
| rs1574424  | 17.36  | 0.94 | 8.61E-05 |
| rs283619   | 3.92   | 0.37 | 8.61E-05 |
| rs10948567 | 21.99  | 1.11 | 8.68E-05 |
| rs3763398  | 3.69   | 0.42 | 8.72E-05 |
| rs4684731  | 9.30   | 0.76 | 8.80E-05 |
| rs17396885 | 7.06   | 0.63 | 8.80E-05 |
| rs10130219 | 3.62   | 0.47 | 8.85E-05 |
| rs6779998  | 3.96   | 0.38 | 8.91E-05 |
| rs7337274  | 9.37   | 0.69 | 8.91E-05 |
| rs3824406  | 26.70  | 1.24 | 8.92E-05 |
| rs3768768  | 14.74  | 0.99 | 8.92E-05 |
| rs13312727 | 25.62  | 1.32 | 8.94E-05 |
| rs17082453 | 12.76  | 0.96 | 8.95E-05 |
| rs6901708  | 3.41   | 0.36 | 9.01E-05 |
| rs11078592 | 7.09   | 0.63 | 9.02E-05 |
| rs9822767  | 4.33   | 0.46 | 9.03E-05 |
| rs2044457  | 10.08  | 0.71 | 9.04E-05 |
| rs17050725 | 12.71  | 1.09 | 9.14E-05 |
| rs738806   | 6.96   | 0.54 | 9.15E-05 |
| rs1604486  | 4.03   | 0.50 | 9.17E-05 |
| rs1567804  | 9.68   | 0.67 | 9.23E-05 |
| rs2421139  | 4.71   | 0.40 | 9.23E-05 |
| rs10405596 | 4.47   | 0.40 | 9.24E-05 |
| rs12308795 | 59.04  | 1.78 | 9.31E-05 |
| rs6080259  | 8.65   | 0.69 | 9.35E-05 |
| rs6448490  | 99.78  | 6.44 | 9.40E-05 |
| rs2000695  | 4.28   | 0.44 | 9.41E-05 |
| rs2997399  | 338.88 | 9.81 | 9.46E-05 |
| rs35918317 | 12.07  | 0.78 | 9.46E-05 |
| rs11904214 | 17.45  | 1.14 | 9.48E-05 |
| rs17769320 | 10.86  | 0.85 | 9.50E-05 |

|            |         |      |          |
|------------|---------|------|----------|
| rs17041005 | 12.76   | 1.00 | 9.51E-05 |
| rs11205383 | 5.23    | 0.43 | 9.52E-05 |
| rs9681462  | 4.20    | 0.43 | 9.55E-05 |
| rs1333034  | 9.09    | 0.64 | 9.56E-05 |
| rs6005757  | 6.08    | 0.49 | 9.56E-05 |
| rs1046356  | 26.76   | 1.37 | 9.62E-05 |
| rs6911846  | 3.67    | 0.37 | 9.68E-05 |
| rs1119478  | 62.39   | 4.07 | 9.70E-05 |
| rs1031866  | 60.64   | 4.08 | 9.75E-05 |
| rs12155385 | 13.86   | 0.89 | 9.81E-05 |
| rs17047540 | 22.10   | 1.20 | 9.84E-05 |
| rs10213930 | 8.30    | 0.64 | 9.97E-05 |
| rs17372842 | 12.27   | 0.82 | 9.98E-05 |
| rs11169947 | 3.74    | 0.40 | 9.99E-05 |
| rs7751276  | 4.25    | 0.45 | 9.99E-05 |
| rs7874051  | 7347.77 | 7.28 | 1.00E-04 |
