# Supplementary material for: Genetic Variants in the Bone Morphogenic Protein Gene Family Modify the Association between Residential Exposure to Traffic and Peripheral Arterial Disease
Source: PLOS journal article supplement (doi:10.1371/journal.pone.0152670), 2016-04-15
Supplement: S7 (10.1371/journal.pone.0152670.s007) [file journal.pone.0152670.s007.PDF › journal.pone.0152670.s007.PDF]

S4 Table (a). Effect Estimates for interaction, main effect, and environmental association terms for suggestive EA GWIS variants

| Chrom | BP        | SNP        | EA GxE OR (SE) | EA GxE P | EA G OR (SE) | EA G P | EA E OR (SE) | EA E P |
|-------|-----------|------------|----------------|----------|--------------|--------|--------------|--------|
| 1     | 39995074  | rs755249   | 3.45 (0.23)    | 2.29E-08 | 0.27 (0.31)  | 0.39   | 0.49 (0.22)  | 0.52   |
| 9     | 97261572  | rs9409787  | 4.93 (0.33)    | 6.87E-08 | 0.13 (0.5)   | 0.19   | 0.62 (0.19)  | 0.50   |
| 1     | 40035686  | rs17513135 | 3.34 (0.24)    | 1.33E-07 | 0.3 (0.31)   | 0.56   | 0.5 (0.22)   | 0.52   |
| 1     | 39731550  | rs4660214  | 3.08 (0.24)    | 1.26E-06 | 0.28 (0.32)  | 0.27   | 0.55 (0.21)  | 0.52   |
| 1     | 39835817  | rs2296172  | 3.08 (0.24)    | 1.28E-06 | 0.28 (0.32)  | 0.26   | 0.55 (0.21)  | 0.52   |
| 1     | 39913351  | rs2296173  | 3.08 (0.24)    | 1.28E-06 | 0.28 (0.32)  | 0.26   | 0.55 (0.21)  | 0.52   |
| 1     | 39880319  | rs3768302  | 3.08 (0.24)    | 1.28E-06 | 0.28 (0.32)  | 0.26   | 0.55 (0.21)  | 0.52   |
| 1     | 39815143  | rs16826093 | 3.07 (0.24)    | 1.33E-06 | 0.28 (0.32)  | 0.27   | 0.55 (0.21)  | 0.52   |
| 1     | 39797055  | rs16826069 | 2.99 (0.24)    | 1.35E-06 | 0.28 (0.32)  | 0.21   | 0.56 (0.21)  | 0.53   |
| 1     | 40050568  | rs7539279  | 2.81 (0.22)    | 1.41E-06 | 0.44 (0.24)  | 0.91   | 0.41 (0.25)  | 0.51   |
| 1     | 39991588  | rs3738676  | 2.81 (0.22)    | 1.51E-06 | 0.46 (0.24)  | 0.76   | 0.4 (0.26)   | 0.51   |
| 1     | 40044713  | rs7520271  | 2.8 (0.22)     | 1.55E-06 | 0.44 (0.24)  | 0.91   | 0.42 (0.25)  | 0.52   |
| 1     | 39569571  | rs2282231  | 3.07 (0.25)    | 1.62E-06 | 0.25 (0.33)  | 0.11   | 0.57 (0.2)   | 0.52   |
| 1     | 218575202 | rs1317681  | 3.57 (0.29)    | 2.21E-06 | 0.24 (0.38)  | 0.26   | 0.62 (0.19)  | 0.50   |
| 9     | 97072647  | rs2479587  | 7.07 (0.48)    | 2.26E-06 | 0.07 (0.79)  | 0.18   | 0.69 (0.18)  | 0.38   |
| 5     | 161997490 | rs10063408 | 2.83 (0.23)    | 3.57E-06 | 0.47 (0.26)  | 0.59   | 0.45 (0.24)  | 0.51   |
| 1     | 40049184  | rs11206378 | 2.64 (0.22)    | 5.98E-06 | 0.45 (0.24)  | 0.91   | 0.42 (0.26)  | 0.51   |
| 5     | 162019898 | rs6879255  | 2.68 (0.22)    | 6.06E-06 | 0.49 (0.26)  | 0.51   | 0.45 (0.25)  | 0.51   |
| 6     | 152054374 | rs12195741 | 2.5 (0.21)     | 6.32E-06 | 0.47 (0.25)  | 0.72   | 0.46 (0.24)  | 0.50   |
| 13    | 40297797  | rs9548897  | 2.76 (0.23)    | 6.61E-06 | 0.58 (0.21)  | 0.23   | 0.27 (0.34)  | 0.48   |
| 5     | 161994889 | rs12651722 | 2.66 (0.23)    | 7.36E-06 | 0.48 (0.26)  | 0.63   | 0.47 (0.24)  | 0.51   |
| 20    | 18043927  | rs6045173  | 0.39 (0.21)    | 7.70E-06 | 2.08 (0.22)  | 0.92   | 2.36 (0.24)  | 0.51   |
| 1     | 39695155  | rs10788933 | 2.76 (0.23)    | 7.72E-06 | 0.3 (0.28)   | 0.07   | 0.51 (0.22)  | 0.52   |
| 5     | 162023980 | rs2431268  | 2.67 (0.23)    | 7.76E-06 | 0.49 (0.26)  | 0.55   | 0.45 (0.25)  | 0.51   |
| 10    | 88745260  | rs11202287 | 4.31 (0.36)    | 8.55E-06 | 0.16 (0.53)  | 0.17   | 0.69 (0.18)  | 0.50   |

S4 Table (b). Effect Estimates for interaction, main effect, and environmental association terms for suggestive AA GWIS variants

| Chrom | BP        | SNP        | AA GxE OR (SE) | AA GxE P | AA G OR (SE) | AA G P | AA E OR (SE) | AA E P |
|-------|-----------|------------|----------------|----------|--------------|--------|--------------|--------|
| 2     | 161732534 | RS634138   | 6.1 (0.64)     | 7.67E-07 | 0.11 (1.11)  | 0.48   | 0.58 (0.31)  | 0.42   |
| 16    | 78805200  | RS2161719  | 5.76 (0.42)    | 2.72E-06 | 0.09 (0.76)  | 0.17   | 0.38 (0.38)  | 0.46   |
| 21    | 21812972  | RS2989314  | 9.79 (0.67)    | 2.90E-06 | 0.19 (0.77)  | 0.55   | 0.33 (0.45)  | 0.44   |
| 16    | 27270607  | RS9940555  | 7.72 (0.51)    | 3.03E-06 | 0.05 (0.87)  | 0.11   | 0.4 (0.37)   | 0.46   |
| 6     | 151236180 | RS9397365  | 21.07 (0.76)   | 4.46E-06 | 0.04 (1.15)  | 0.71   | 0.4 (0.38)   | 0.45   |
| 10    | 101121718 | RS11190074 | 7.36 (0.62)    | 4.97E-06 | 0.04 (1.25)  | 0.44   | 0.58 (0.31)  | 0.43   |
| 6     | 144749359 | RS6570628  | 21.77 (0.8)    | 5.82E-06 | 0.01 (1.48)  | 0.14   | 0.47 (0.35)  | 0.39   |
| 7     | 97231097  | RS7787478  | 7.92 (0.57)    | 7.06E-06 | 0.05 (1.02)  | 0.26   | 0.46 (0.36)  | 0.45   |
| 10    | 115070140 | RS499832   | 6.66 (0.48)    | 8.09E-06 | 0.05 (0.89)  | 0.01   | 0.46 (0.34)  | 0.42   |
