# Supplementary material for: Genetic Variants in the Bone Morphogenic Protein Gene Family Modify the Association between Residential Exposure to Traffic and Peripheral Arterial Disease
Source: PLOS journal article supplement (doi:10.1371/journal.pone.0152670), 2016-04-15
Supplement: S8 (10.1371/journal.pone.0152670.s008) [file journal.pone.0152670.s008.PDF › journal.pone.0152670.s008.PDF]

S5 Supplementary Table. Consistency between EA Suggestive Results and AA results.

| Chrom | BP        | SNP        | OR (EA) | P (EA)   | MAF (EA) | OR (AA) | P (AA) | MAF (AA) | Locus        |
|-------|-----------|------------|---------|----------|----------|---------|--------|----------|--------------|
| 10    | 88745260  | rs11202287 | 4.31    | 8.55E-06 | 0.11     | 0.52    | 0.31   | 0.14     | AGAP11       |
| 1     | 39995074  | rs755249   | 3.45    | 2.29E-08 | 0.24     |         |        | < 0.05   | BMP8A        |
| 1     | 39991588  | rs3738676  | 2.81    | 1.51E-06 | 0.36     | 0.66    | 0.35   | 0.34     | BMP8A        |
| 13    | 40297797  | rs9548897  | 2.76    | 6.61E-06 | 0.49     | 1.08    | 0.85   | 0.35     | COG6         |
| 9     | 97261572  | rs9409787  | 4.93    | 6.87E-08 | 0.13     | 0.46    | 0.19   | 0.26     | DHS          |
| 6     | 152054374 | rs12195741 | 2.50    | 6.32E-06 | 0.31     | 0.15    | 0.10   | 0.06     | ESR1         |
| 9     | 97072647  | rs2479587  | 7.07    | 2.26E-06 | 0.07     | 0.03    | 0.22   | 0.09     | LOC105376154 |
| 1     | 39731550  | rs4660214  | 3.08    | 1.26E-06 | 0.22     |         |        | < 0.05   | MACF1        |
| 1     | 39835817  | rs2296172  | 3.08    | 1.28E-06 | 0.22     |         |        | < 0.05   | MACF1        |
| 1     | 39880319  | rs3768302  | 3.08    | 1.28E-06 | 0.22     |         |        | < 0.05   | MACF1        |
| 1     | 39913351  | rs2296173  | 3.08    | 1.28E-06 | 0.22     |         |        | < 0.05   | MACF1        |
| 1     | 39815143  | rs16826093 | 3.07    | 1.33E-06 | 0.22     |         |        | < 0.05   | MACF1        |
| 1     | 39797055  | rs16826069 | 2.99    | 1.35E-06 | 0.22     |         |        | < 0.05   | MACF1        |
| 1     | 39569571  | rs2282231  | 3.07    | 1.62E-06 | 0.22     | 0.52    | 0.36   | 0.14     | MACF1        |
| 1     | 39695155  | rs10788933 | 2.76    | 7.72E-06 | 0.30     | 0.90    | 0.79   | 0.34     | MACF1        |
| 1     | 40035686  | rs17513135 | 3.34    | 1.33E-07 | 0.23     |         |        | < 0.05   | PAPBC4       |
| 1     | 218575202 | rs1317681  | 3.57    | 2.21E-06 | 0.17     | 0.71    | 0.59   | 0.15     | TGFB2        |
| 1     | 40050568  | rs7539279  | 2.81    | 1.41E-06 | 0.34     | 0.94    | 0.87   | 0.49     |              |
| 1     | 40044713  | rs7520271  | 2.80    | 1.55E-06 | 0.34     | 0.99    | 0.98   | 0.50     |              |
| 5     | 161997490 | rs10063408 | 2.83    | 3.57E-06 | 0.28     | 1.23    | 0.70   | 0.16     |              |
| 1     | 40049184  | rs11206378 | 2.64    | 5.98E-06 | 0.37     | 1.25    | 0.59   | 0.41     |              |
| 5     | 162019898 | rs6879255  | 2.68    | 6.06E-06 | 0.29     | 1.69    | 0.26   | 0.27     |              |
| 5     | 161994889 | rs12651722 | 2.66    | 7.36E-06 | 0.28     | 0.38    | 0.12   | 0.24     |              |
| 20    | 18043927  | rs6045173  | 0.39    | 7.70E-06 | 0.46     | 0.66    | 0.35   | 0.28     |              |
| 5     | 162023980 | rs2431268  | 2.67    | 7.76E-06 | 0.29     | 1.18    | 0.68   | 0.34     |              |
