# Supplementary material for: Genetic Variants in the Bone Morphogenic Protein Gene Family Modify the Association between Residential Exposure to Traffic and Peripheral Arterial Disease
Source: PLOS journal article supplement (doi:10.1371/journal.pone.0152670), 2016-04-15
Supplement: S9 (10.1371/journal.pone.0152670.s009) [file journal.pone.0152670.s009.PDF › journal.pone.0152670.s009.PDF]

S6 Supplementary Table. Meta-Analysis Suggestive Results

| Chrom | BP        | SNP        | OR (EA) | P (EA)   | MAF (EA) | OR (AA) | P (AA)   | MAF (AA) | Meta-Analysis P | Consistent | Effect Allele |
|-------|-----------|------------|---------|----------|----------|---------|----------|----------|-----------------|------------|---------------|
| 5     | 162019898 | rs6879255  | 2.68    | 6.06E-06 | 0.29     | 1.69    | 0.26     | 0.27     | 7.76E-06        | Yes        | G             |
| 1     | 39995074  | rs755249   | 3.45    | 2.29E-08 | 0.24     | 0.04    | 0.34     | 0.04     | 1.45E-05        | No         | G             |
| 5     | 161997490 | rs10063408 | 2.83    | 3.57E-06 | 0.28     | 1.23    | 0.70     | 0.16     | 2.73E-05        | Yes        | G             |
| 1     | 40044713  | rs7520271  | 2.80    | 1.55E-06 | 0.34     | 0.99    | 0.98     | 0.50     | 3.22E-05        | Yes        | C             |
| 1     | 40035686  | rs17513135 | 3.34    | 1.33E-07 | 0.23     | 0.05    | 0.35     | 0.04     | 4.54E-05        | No         | G             |
| 1     | 40050568  | rs7539279  | 2.81    | 1.41E-06 | 0.34     | 0.94    | 0.87     | 0.49     | 4.60E-05        | No         | G             |
| 5     | 162023980 | rs2431268  | 2.67    | 7.76E-06 | 0.29     | 1.18    | 0.68     | 0.34     | 4.79E-05        | Yes        | G             |
| 1     | 39695155  | rs10788933 | 2.76    | 7.72E-06 | 0.30     | 0.90    | 0.79     | 0.34     | 6.46E-05        | Yes        | G             |
| 9     | 97261572  | rs9409787  | 4.93    | 6.87E-08 | 0.13     | 0.46    | 0.19     | 0.26     | 6.76E-05        | No         | G             |
| 13    | 40297797  | rs9548897  | 2.76    | 6.61E-06 | 0.49     | 1.08    | 0.85     | 0.35     | 6.86E-05        | Yes        | G             |
| 1     | 39797055  | rs16826069 | 2.99    | 1.35E-06 | 0.22     | 0.66    | 0.67     | 0.04     | 7.74E-05        | No         | G             |
| 21    | 21812972  | rs2989314  | 2.21    | 0.08     | 0.07     | 9.79    | 2.90E-06 | 0.12     | 1.14E-04        | Yes        | C             |
| 1     | 218575202 | rs1317681  | 3.57    | 2.21E-06 | 0.17     | 0.71    | 0.59     | 0.15     | 1.37E-04        | No         | G             |
| 1     | 39880319  | rs3768302  | 3.08    | 1.28E-06 | 0.22     | 0.12    | 0.34     | 0.03     | 2.19E-04        | No         | C             |
| 1     | 39835817  | rs2296172  | 3.08    | 1.28E-06 | 0.22     | 0.12    | 0.34     | 0.03     | 2.19E-04        | No         | G             |
| 1     | 39913351  | rs2296173  | 3.08    | 1.28E-06 | 0.22     | 0.12    | 0.33     | 0.04     | 2.32E-04        | No         | G             |
| 1     | 39815143  | rs16826093 | 3.07    | 1.33E-06 | 0.22     | 0.12    | 0.33     | 0.04     | 2.39E-04        | No         | t             |
| 1     | 39991588  | rs3738676  | 2.81    | 1.51E-06 | 0.36     | 0.66    | 0.35     | 0.34     | 2.39E-04        | No         | C             |
| 1     | 39569571  | rs2282231  | 3.07    | 1.62E-06 | 0.22     | 0.52    | 0.36     | 0.14     | 2.39E-04        | No         | G             |
| 1     | 39731550  | rs4660214  | 3.08    | 1.26E-06 | 0.22     | 0.12    | 0.31     | 0.04     | 2.44E-04        | No         | G             |
| 1     | 40049184  | rs11206378 | 2.64    | 5.98E-06 | 0.37     | 1.25    | 0.59     | 0.41     | 2.84E-04        | No         | G             |
| 9     | 97072647  | rs2479587  | 7.07    | 2.26E-06 | 0.07     | 0.03    | 0.22     | 0.09     | 5.52E-04        | No         | C             |
| 20    | 18043927  | rs6045173  | 0.39    | 7.70E-06 | 0.46     | 0.66    | 0.35     | 0.28     | 7.06E-04        | No         | G             |
| 10    | 88745260  | rs11202287 | 4.31    | 8.55E-06 | 0.11     | 0.52    | 0.31     | 0.14     | 8.77E-04        | No         | G             |
| 6     | 144749359 | rs6570628  | 1.62    | 0.32     | 0.05     | 21.77   | 5.82E-06 | 0.12     | 0.002           | Yes        | G             |
| 5     | 161994889 | rs12651722 | 2.66    | 7.36E-06 | 0.28     | 0.38    | 0.12     | 0.24     | 0.002           | No         | G             |
| 6     | 152054374 | rs12195741 | 2.50    | 6.32E-06 | 0.31     | 0.15    | 0.10     | 0.06     | 0.002           | No         | G             |
| 16    | 27270607  | rs9940555  | 1.59    | 0.58     | 0.02     | 7.72    | 3.03E-06 | 0.17     | 0.004           | Yes        | G             |
| 4     | 39529700  | rs3755899  | 1.18    | 0.64     | 0.06     | 1789.83 | 1.92E-06 | 0.08     | 0.005           | Yes        | G             |
| 2     | 161732534 | rs634138   | 0.44    | 1.00     | 0.00     | 6.10    | 7.67E-07 | 0.08     | 0.01            | No         | G             |
| 16    | 78805200  | rs2161719  | 0.86    | 0.60     | 0.14     | 5.76    | 2.72E-06 | 0.18     | 0.05            | No         | G             |
| 13    | 44877318  | rs9567406  | 0.66    | 0.27     | 0.13     | 68.32   | 9.83E-08 | 0.11     | 0.08            | No         | G             |
| 10    | 101121718 | rs11190074 | 0.69    | 0.36     | 0.09     | 7.36    | 4.97E-06 | 0.09     | 0.13            | No         | G             |
| 10    | 115070140 | rs499832   | 0.70    | 0.36     | 0.09     | 6.66    | 8.09E-06 | 0.20     | 0.14            | No         | C             |
| 7     | 97231097  | rs7787478  | 0.47    | 0.09     | 0.10     | 7.92    | 7.06E-06 | 0.13     | 0.43            | No         | G             |
| 6     | 151236180 | rs9397365  | 0.37    | 0.004    | 0.15     | 21.07   | 4.46E-06 | 0.09     | 0.88            | No         | G             |
