# Supplementary material for: Genetic Variants in the Bone Morphogenic Protein Gene Family Modify the Association between Residential Exposure to Traffic and Peripheral Arterial Disease
Source: PLOS journal article supplement (doi:10.1371/journal.pone.0152670), 2016-04-15
Supplement: S10 (10.1371/journal.pone.0152670.s010) [file journal.pone.0152670.s010.PDF › journal.pone.0152670.s010.PDF]

**S7 Table. Interaction results for all loci tested in the bone morphogenic protein family of genes (BMP1, BMP2, BMP4, BMP7, BMP8A, BMP9, BMP10, and BMPER).**

| BMP1  |          |            |         |         |          |          |         |         |          |          |
|-------|----------|------------|---------|---------|----------|----------|---------|---------|----------|----------|
| CHROM | BP       | PROBE      | OR (EA) | SE (EA) | P (EA)   | MAF (EA) | OR (AA) | SE (AA) | P (AA)   | MAF (AA) |
| 8     | 22024523 | rs10096505 | 1.06    | 0.21    | 7.84E-01 | 0.48     | 0.84    | 0.43    | 7.24E-01 | 0.36     |
| 8     | 22025644 | rs7812993  | 1.16    | 0.27    | 5.68E-01 | 0.22     | 0.71    | 0.44    | 4.85E-01 | 0.29     |
| 8     | 22029129 | rs10095410 | 0.00    | 6364.57 | 9.75E-02 | < 0.01   | 1.04    | 0.55    | 9.44E-01 | 0.09     |
| 8     | 22033435 | rs11777932 | 1.08    | 0.45    | 8.59E-01 | 0.08     | 0.29    | 1.70    | 4.81E-01 | 0.03     |
| 8     | 22038952 | rs7838961  | 1.16    | 0.22    | 5.00E-01 | 0.49     | 1.04    | 0.39    | 9.27E-01 | 0.36     |
| 8     | 22042151 | rs7819541  | 0.61    | 0.63    | 4.34E-01 | 0.07     | 1.33    | 0.38    | 4.93E-01 | 0.46     |
| 8     | 22042197 | rs4507761  | 1.12    | 0.39    | 7.68E-01 | 0.08     | 1.24    | 1746.86 | 9.99E-01 | 0.01     |
| 8     | 22046829 | rs11994254 |         |         |          | <0.01    | 1.48    | 0.65    | 5.85E-01 | 0.04     |
| 8     | 22048790 | rs12114940 | 1.01    | 0.22    | 9.70E-01 | 0.43     | 0.94    | 0.46    | 9.11E-01 | 0.26     |
| 8     | 22049780 | rs3924231  | 0.88    | 0.36    | 7.25E-01 | 0.17     | 0.89    | 0.39    | 7.94E-01 | 0.47     |
| 8     | 22049892 | rs3924229  | 1.11    | 0.42    | 8.10E-01 | 0.11     | 0.61    | 0.46    | 3.32E-01 | 0.23     |
| 8     | 22051849 | rs6997623  | 0.52    | 2333.79 | 9.99E-01 | 0.00     | 0.60    | 0.62    | 4.52E-01 | 0.16     |
| 8     | 22053123 | rs4075478  | 1.01    | 0.23    | 9.74E-01 | 0.38     | 1.02    | 0.34    | 9.59E-01 | 0.41     |
| 8     | 22054197 | rs12675993 | 1.16    | 0.41    | 7.22E-01 | 0.10     | 1.21    | 0.61    | 7.78E-01 | 0.11     |

| 8     | 22055348 | rs3857979  | 1.07    | 0.22    | 7.69E-01 | 0.48     | 1.07    | 0.38    | 8.81E-01 | 0.33     |
|-------|----------|------------|---------|---------|----------|----------|---------|---------|----------|----------|
| 8     | 22057449 | rs7827382  | 0.58    | 0.30    | 7.27E-02 | 0.22     | 1.36    | 0.47    | 5.55E-01 | 0.22     |
| 8     | 22058122 | rs11775186 | 0.78    | 0.44    | 5.69E-01 | 0.09     | 1.03    | 0.67    | 9.63E-01 | 0.09     |
| 8     | 22058904 | rs11784926 | 0.34    | 1.00    | 2.51E-01 | 0.04     | 0.02    | 2.89    | 2.60E-01 | 0.02     |
| 8     | 22059363 | rs11996036 | 0.80    | 0.49    | 6.45E-01 | 0.06     | 0.93    | 0.66    | 9.19E-01 | 0.09     |
| 8     | 22059413 | rs28710878 | 0.00    | 4794.06 | 7.24E-02 | < 0.01   | 1.64    | 0.49    | 3.60E-01 | 0.10     |
| 8     | 22062432 | rs10107545 | 0.93    | 1066.24 | 9.98E-01 | < 0.01   | 1.07    | 0.80    | 9.43E-01 | 0.09     |
| 8     | 22063438 | rs6983732  | 0.50    | 0.34    | 3.87E-02 | 0.13     | 1.25    | 0.37    | 5.80E-01 | 0.27     |
| 8     | 22067769 | rs4242430  | 0.79    | 0.27    | 3.83E-01 | 0.31     | 0.84    | 0.72    | 8.30E-01 | 0.09     |
| 8     | 22067774 | rs4076873  | 0.92    | 0.25    | 7.25E-01 | 0.24     | 1.08    | 0.39    | 8.63E-01 | 0.47     |
| 8     | 22069018 | rs11778448 | 0.94    | 0.25    | 8.00E-01 | 0.24     | 1.74    | 0.39    | 1.94E-01 | 0.34     |
| BMP2  |          |            |         |         |          |          |         |         |          |          |
| CHROM | BP       | PROBE      | OR (EA) | SE (EA) | P (EA)   | MAF (EA) | OR (AA) | SE (AA) | P (AA)   | MAF (AA) |
| 20    | 6751034  | rs1049007  | 0.56    | 0.23    | 1.10E-02 | 0.38     | 0.39    | 0.78    | 2.54E-01 | 0.12     |
| 20    | 6751316  | rs7270163  | 1.87    | 0.30    | 3.44E-02 | 0.11     | 3.56    | 0.39    | 2.51E-03 | 0.31     |
| 20    | 6754246  | rs235764   | 1.71    | 0.23    | 1.98E-02 | 0.27     | 3.58    | 0.42    | 5.46E-03 | 0.41     |
| 20    | 6755598  | rs235767   | 1.68    | 0.22    | 1.84E-02 | 0.39     | 3.66    | 0.49    | 1.59E-02 | 0.48     |
| 20    | 6756148  | rs1005464  | 1.10    | 0.25    | 7.21E-01 | 0.22     | 0.26    | 1.05    | 2.24E-01 | 0.10     |
| 20    | 6759115  | rs235768   | 0.54    | 0.23    | 7.28E-03 | 0.39     | 0.13    | 1.36    | 1.28E-01 | 0.06     |

| 20    | 6759980  | rs15705    | 1.38    | 0.26    | 2.10E-01 | 0.22     | 1.28    | 0.49    | 6.51E-01 | 0.23     |
|-------|----------|------------|---------|---------|----------|----------|---------|---------|----------|----------|
| 20    | 6760201  | rs3178250  | 1.40    | 0.27    | 2.22E-01 | 0.19     | 1.53    | 0.49    | 4.29E-01 | 0.21     |
| 20    | 6760431  | rs170986   | 1.37    | 0.27    | 2.35E-01 | 0.17     | 2.49    | 0.39    | 2.97E-02 | 0.31     |
| BMP4  |          |            |         |         |          |          |         |         |          |          |
| CHROM | BP       | PROBE      | OR (EA) | SE (EA) | P (EA)   | MAF (EA) | OR (AA) | SE (AA) | P (AA)   | MAF (AA) |
| 14    | 54417522 | rs17563    | 1.36    | 0.23    | 1.72E-01 | 0.44     | 0.66    | 0.48    | 4.30E-01 | 0.24     |
| 14    | 54418411 | rs2071047  | 0.66    | 0.23    | 7.58E-02 | 0.41     | 0.97    | 0.43    | 9.56E-01 | 0.39     |
| 14    | 54420653 | rs10140018 | 1.01    | 1.11    | 9.90E-01 | 0.01     | 0.38    | 2.62    | 7.42E-01 | 0.03     |
| BMP7  |          |            |         |         |          |          |         |         |          |          |
| CHROM | BP       | PROBE      | OR (EA) | SE (EA) | P (EA)   | MAF (EA) | OR (AA) | SE (AA) | P (AA)   | MAF (AA) |
| 20    | 55743905 | rs12438    | 1.26    | 0.22    | 2.98E-01 | 0.49     | 2.10    | 0.37    | 6.22E-02 | 0.25     |
| 20    | 55744499 | rs6014947  | 1.21    | 0.22    | 3.82E-01 | 0.49     | 1.87    | 0.39    | 1.27E-01 | 0.21     |
| 20    | 55749781 | rs6025422  | 1.20    | 0.22    | 4.08E-01 | 0.50     | 1.77    | 0.36    | 1.46E-01 | 0.39     |
| 20    | 55753082 | rs6025427  | 0.14    | 2.55    | 3.88E-01 | < 0.01   | 1.12    | 0.59    | 8.64E-01 | 0.14     |
| 20    | 55754110 | rs3787380  | 1.03    | 0.22    | 8.82E-01 | 0.39     | 0.63    | 0.43    | 3.23E-01 | 0.22     |
| 20    | 55754239 | rs13037653 | 0.50    | 0.49    | 1.48E-01 | 0.07     | 0.13    | 2.41    | 3.79E-01 | 0.01     |
| 20    | 55755170 | rs3787382  | 1.05    | 0.28    | 8.53E-01 | 0.19     | 0.87    | 0.36    | 7.29E-01 | 0.49     |
| 20    | 55756841 | rs6099488  | 0.82    | 5355.63 | 9.99E-01 | < 0.01   | 3.22    | 1.18    | 3.53E-01 | 0.03     |
| 20    | 55756881 | rs6025428  | 1.82    | 1576.23 | 9.98E-01 | < 0.01   | 0.68    | 0.51    | 4.85E-01 | 0.13     |

|    |          |            |      |      |          |        |      |         |          |      |
|----|----------|------------|------|------|----------|--------|------|---------|----------|------|
| 20 | 55758655 | rs6070015  | 0.99 | 0.50 | 9.80E-01 | 0.05   | 1.25 | 0.34    | 5.54E-01 | 0.48 |
| 20 | 55760567 | rs6064508  | 0.77 | 0.24 | 2.84E-01 | 0.37   | 0.52 | 0.55    | 2.72E-01 | 0.16 |
| 20 | 55761285 | rs1318379  | 1.12 | 0.48 | 8.13E-01 | 0.06   | 1.03 | 0.36    | 9.36E-01 | 0.36 |
| 20 | 55762947 | rs6123674  | 1.24 | 0.23 | 3.53E-01 | 0.42   | 1.19 | 0.41    | 6.98E-01 | 0.21 |
| 20 | 55763739 | rs6099492  | 0.50 | 0.84 | 4.04E-01 | 0.03   | 1.49 | 0.42    | 3.97E-01 | 0.14 |
| 20 | 55764104 | rs6064509  | 1.24 | 0.73 | 7.71E-01 | 0.02   | 5.78 | 2433.94 | 9.99E-01 | 0.00 |
| 20 | 55772683 | rs230191   | 1.37 | 0.22 | 1.57E-01 | 0.49   | 0.57 | 0.45    | 2.59E-01 | 0.24 |
| 20 | 55776447 | rs230198   | 0.67 | 0.22 | 7.28E-02 | 0.46   | 2.02 | 0.38    | 9.51E-02 | 0.38 |
| 20 | 55785618 | rs6123677  | 1.39 | 0.22 | 1.41E-01 | 0.49   | 0.76 | 0.48    | 6.00E-01 | 0.14 |
| 20 | 55786811 | rs6025446  | 0.99 | 0.22 | 9.79E-01 | 0.42   | 1.04 | 0.35    | 9.17E-01 | 0.46 |
| 20 | 55787622 | rs12481628 | 0.63 | 0.22 | 3.66E-02 | 0.44   | 1.12 | 0.37    | 7.90E-01 | 0.33 |
| 20 | 55788009 | rs10470036 | 0.55 | 2.44 | 8.04E-01 | < 0.01 | 3.20 | 0.47    | 7.46E-03 | 0.08 |
| 20 | 55789914 | rs3764677  | 0.58 | 0.23 | 1.91E-02 | 0.42   | 1.49 | 0.36    | 3.10E-01 | 0.35 |
| 20 | 55790147 | rs6025447  | 0.56 | 0.23 | 1.26E-02 | 0.40   | 0.53 | 0.76    | 4.38E-01 | 0.16 |
| 20 | 55791348 | rs6123679  | 2.50 | 0.72 | 1.75E-01 | 0.03   | 0.49 | 1.75    | 7.02E-01 | 0.01 |
| 20 | 55792300 | rs1002432  | 1.07 | 0.61 | 9.09E-01 | 0.03   | 1.21 | 0.36    | 6.30E-01 | 0.37 |
| 20 | 55794749 | rs46995    | 0.63 | 0.23 | 3.97E-02 | 0.43   | 0.38 | 0.71    | 1.99E-01 | 0.20 |
| 20 | 55797057 | rs6127972  | 0.58 | 0.23 | 1.62E-02 | 0.41   | 0.52 | 0.70    | 3.90E-01 | 0.19 |
| 20 | 55800039 | rs172983   | 1.42 | 0.31 | 2.47E-01 | 0.11   | 0.59 | 0.56    | 3.90E-01 | 0.17 |

| 20    | 55802736 | rs162311   | 1.38    | 0.29    | 2.70E-01 | 0.13     | 0.56    | 0.39    | 1.71E-01 | 0.42     |
|-------|----------|------------|---------|---------|----------|----------|---------|---------|----------|----------|
| 20    | 55802858 | rs162312   | 1.49    | 0.27    | 1.38E-01 | 0.17     | 0.67    | 0.43    | 3.99E-01 | 0.34     |
| 20    | 55803687 | rs17404303 | 1.28    | 0.22    | 2.66E-01 | 0.41     | 1.66    | 0.48    | 3.34E-01 | 0.12     |
| 20    | 55805127 | rs2180782  | 1.43    | 0.26    | 1.68E-01 | 0.17     | 0.53    | 0.40    | 1.59E-01 | 0.43     |
| 20    | 55806280 | rs6127973  | 0.77    | 0.33    | 4.39E-01 | 0.15     | 0.00    | 5.31    | 1.27E-01 | 0.03     |
| 20    | 55806340 | rs186659   | 0.59    | 0.23    | 2.08E-02 | 0.40     | 0.32    | 0.95    | 2.63E-01 | 0.11     |
| 20    | 55807110 | rs6014959  | 1.75    | 0.32    | 7.61E-02 | 0.13     | 1.24    | 0.38    | 6.16E-01 | 0.45     |
| 20    | 55809072 | rs1028644  | 1.71    | 0.24    | 2.34E-02 | 0.25     | 1.00    | 0.45    | 9.93E-01 | 0.31     |
| 20    | 55811812 | rs6025456  | 2.41    | 1.81    | 6.22E-01 | 0.01     | 1.58    | 0.35    | 2.42E-01 | 0.25     |
| 20    | 55812058 | rs7273197  | 1.01    | 0.23    | 9.81E-01 | 0.31     | 1.79    | 0.49    | 2.84E-01 | 0.13     |
| 20    | 55816734 | rs4361186  | 3.91    | 1.71    | 4.10E-01 | 0.01     | 1.68    | 0.36    | 1.97E-01 | 0.33     |
| 20    | 55824475 | rs6127983  | 1.23    | 0.22    | 3.54E-01 | 0.35     | 0.88    | 0.37    | 7.61E-01 | 0.42     |
| 20    | 55824533 | rs182784   | 0.64    | 0.22    | 3.98E-02 | 0.48     | 0.28    | 0.58    | 4.04E-02 | 0.28     |
| 20    | 55824760 | rs6127985  | 1.26    | 0.28    | 4.10E-01 | 0.16     | 0.70    | 0.46    | 4.82E-01 | 0.24     |
| 20    | 55830151 | rs6025468  | 1.04    | 0.27    | 8.85E-01 | 0.19     | 2.31    | 0.35    | 2.93E-02 | 0.29     |
| 20    | 55834657 | rs7269453  |         |         |          | < 0.01   | 1.14    | 1.00    | 9.07E-01 | 0.07     |
| BMP9  |          |            |         |         |          |          |         |         |          |          |
| CHROM | BP       | PROBE      | OR (EA) | SE (EA) | P (EA)   | MAF (EA) | OR (AA) | SE (AA) | P (AA)   | MAF (AA) |
| 10    | 48413273 | rs3740297  | 0.89    | 794.32  | 9.98E-01 | 0.01     | 0.68    | 1.59    | 8.25E-01 | 0.01     |

## BMP10

| CHROM | BP       | PROBE      | OR (EA)  | SE (EA) | P (EA)   | MAF (EA) | OR (AA) | SE (AA) | P (AA)   | MAF (AA) |
|-------|----------|------------|----------|---------|----------|----------|---------|---------|----------|----------|
| 2     | 69092621 | rs10173546 |          |         |          | < 0.01   | 1.34    | 0.60    | 6.48E-01 | 0.12     |
| 2     | 69093312 | rs2231344  | 2.37     | 0.39    | 2.26E-02 | 0.07     | 0.60    | 0.48    | 3.28E-01 | 0.25     |
| 2     | 69095152 | rs2312078  | 1.11     | 0.22    | 6.25E-01 | 0.39     | 0.73    | 0.40    | 4.75E-01 | 0.45     |
| 2     | 69097862 | rs3817368  | 1.12     | 0.22    | 6.08E-01 | 0.39     | 0.32    | 0.57    | 6.96E-02 | 0.27     |
| 2     | 69097953 | rs6760348  | 1.65E+49 | 3536.57 | 8.80E-02 | < 0.01   | 0.61    | 0.82    | 5.77E-01 | 0.09     |

## BMP8A

| CHROM | BP       | PROBE      | OR (EA) | SE (EA) | P (EA)   | MAF (EA) | OR (AA) | SE (AA) | P (AA)   | MAF (AA) |
|-------|----------|------------|---------|---------|----------|----------|---------|---------|----------|----------|
| 1     | 39963873 | rs2004330  | 0.46    | 0.23    | 5.74E-04 | 0.44     | 1.39    | 0.45    | 5.11E-01 | 0.25     |
| 1     | 39965761 | rs698141   | 0.98    | 0.43    | 9.63E-01 | 0.06     | 0.80    | 0.86    | 8.16E-01 | 0.08     |
| 1     | 39966718 | rs6656934  | 0.78    | 0.36    | 4.95E-01 | 0.11     | 1.04    | 0.35    | 9.11E-01 | 0.47     |
| 1     | 39972874 | rs11206218 | 0.43    | 0.97    | 3.73E-01 | 0.03     | 1.68    | 0.49    | 3.35E-01 | 0.18     |
| 1     | 39973646 | rs782869   | 0.91    | 1.14    | 9.37E-01 | < 0.01   | 0.40    | 0.66    | 1.91E-01 | 0.14     |
| 1     | 39975894 | rs1180327  | 0.11    | 1518.03 | 9.98E-01 | < 0.01   | 0.02    | 4.33    | 4.10E-01 | 0.04     |
| 1     | 39989012 | rs11584399 | 0.90    | 0.35    | 7.55E-01 | 0.09     | 0.91    | 0.74    | 9.13E-01 | 0.05     |
| 1     | 39989926 | rs710913   | 2.42    | 0.21    | 3.04E-05 | 0.36     | 2.11    | 0.38    | 7.33E-02 | 0.31     |
| 1     | 39991588 | rs3738676  | 2.81    | 0.22    | 1.51E-06 | 0.36     | 0.66    | 0.39    | 3.47E-01 | 0.34     |
| 1     | 39992537 | rs1180340  | 0.57    | 718.36  | 9.98E-01 | < 0.01   | 1.91    | 0.44    | 1.58E-01 | 0.12     |

| 1     | 39992808 | rs1180341  | 0.44    | 0.22    | 1.24E-04 | 0.46     | 0.82    | 0.38    | 6.37E-01 | 0.32     |
|-------|----------|------------|---------|---------|----------|----------|---------|---------|----------|----------|
| 1     | 39993432 | rs1180343  | 0.43    | 0.23    | 1.74E-04 | 0.45     | 1.50    | 0.46    | 4.29E-01 | 0.24     |
| 1     | 39995074 | rs755249   | 3.45    | 0.23    | 2.29E-08 | 0.24     | 0.04    | 3.19    | 3.39E-01 | 0.04     |
| BMPER |          |            |         |         |          |          |         |         |          |          |
| CHROM | BP       | PROBE      | OR (EA) | SE (EA) | P (EA)   | MAF (EA) | OR (AA) | SE (AA) | P (AA)   | MAF (AA) |
| 7     | 33949959 | rs7801918  | 0.88    | 0.28    | 6.56E-01 | 0.23     | 0.97    | 0.45    | 9.49E-01 | 0.26     |
| 7     | 33957895 | rs4720146  | 0.21    | 3.52    | 6.13E-01 | < 0.01   | 0.13    | 1.98    | 3.15E-01 | 0.01     |
| 7     | 33959239 | rs1427483  | 0.72    | 0.23    | 1.39E-01 | 0.37     | 1.27    | 0.43    | 6.24E-01 | 0.28     |
| 7     | 33967085 | rs13221600 | 0.60    | 0.25    | 3.63E-02 | 0.25     | 0.53    | 0.73    | 4.24E-01 | 0.12     |
| 7     | 33971904 | rs2016770  | 2.19    | 0.24    | 1.12E-03 | 0.34     | 1.57    | 0.41    | 3.20E-01 | 0.42     |
| 7     | 33972999 | rs747664   | 1.04    | 685.08  | 9.99E-01 | 0.00     | 0.13    | 3.34    | 4.99E-01 | 0.02     |
| 7     | 33973653 | rs10253162 | 2.38    | 0.25    | 4.29E-04 | 0.34     | 1.26    | 0.39    | 5.95E-01 | 0.45     |
| 7     | 33977757 | rs10247996 | 0.70    | 0.23    | 1.18E-01 | 0.46     | 0.81    | 0.45    | 6.71E-01 | 0.31     |
| 7     | 33979694 | rs10486624 | 2.96    | 1345.73 | 9.98E-01 | < 0.01   | 1.72    | 0.56    | 3.79E-01 | 0.09     |
| 7     | 33984313 | rs1427481  | 0.85    | 0.23    | 4.87E-01 | 0.45     | 0.88    | 0.39    | 7.59E-01 | 0.49     |
| 7     | 33991109 | rs13233238 | 0.57    | 0.24    | 2.06E-02 | 0.28     | 1.36    | 0.41    | 4.96E-01 | 0.46     |
| 7     | 33991875 | rs10270579 | 0.57    | 0.24    | 1.79E-02 | 0.29     | 1.53    | 0.38    | 3.15E-01 | 0.47     |
| 7     | 33992983 | rs1365889  | 0.77    | 0.40    | 5.16E-01 | 0.12     | 0.58    | 1.04    | 6.29E-01 | 0.03     |
| 7     | 33996948 | rs12155213 | 0.63    | 0.24    | 4.78E-02 | 0.31     | 1.44    | 0.37    | 3.75E-01 | 0.47     |

|   |          |            |      |      |          |        |      |      |          |      |
|---|----------|------------|------|------|----------|--------|------|------|----------|------|
| 7 | 33998587 | rs4723343  | 1.32 | 0.22 | 2.16E-01 | 0.42   | 2.76 | 0.43 | 3.25E-02 | 0.37 |
| 7 | 34000224 | rs9639688  | 1.41 | 0.23 | 1.37E-01 | 0.23   | 0.25 | 0.70 | 5.17E-02 | 0.17 |
| 7 | 34009946 | rs10265207 | 1.05 | 0.22 | 8.28E-01 | 0.47   | 1.96 | 0.36 | 8.42E-02 | 0.38 |
| 7 | 34012829 | rs1365888  | 0.71 | 0.39 | 3.80E-01 | 0.12   | 0.60 | 0.88 | 6.02E-01 | 0.08 |
| 7 | 34013178 | rs13243958 | 1.20 | 0.22 | 3.99E-01 | 0.35   | 0.50 | 0.41 | 1.25E-01 | 0.42 |
| 7 | 34017577 | rs10276432 | 1.07 | 0.22 | 7.57E-01 | 0.35   | 0.67 | 0.41 | 3.75E-01 | 0.42 |
| 7 | 34021755 | rs12701341 | 0.91 | 0.22 | 6.63E-01 | 0.40   | 0.66 | 0.40 | 3.50E-01 | 0.46 |
| 7 | 34022301 | rs10486625 | 1.12 | 0.22 | 6.06E-01 | 0.37   | 0.54 | 0.37 | 1.28E-01 | 0.49 |
| 7 | 34024288 | rs6951556  |      |      |          | < 0.01 | 0.06 | 2.78 | 3.33E-01 | 0.01 |
| 7 | 34035784 | rs6948650  | 1.17 | 0.39 | 6.87E-01 | 0.07   | 0.45 | 0.78 | 3.40E-01 | 0.09 |
| 7 | 34036618 | rs9986855  | 0.81 | 0.30 | 4.76E-01 | 0.15   | 0.45 | 1.05 | 4.62E-01 | 0.03 |
| 7 | 34038414 | rs17169617 | 0.90 | 0.29 | 7.04E-01 | 0.17   | 0.40 | 0.56 | 1.39E-01 | 0.22 |
| 7 | 34043348 | rs10951405 | 0.59 | 0.30 | 7.34E-02 | 0.18   | 0.91 | 0.56 | 8.86E-01 | 0.14 |
| 7 | 34046002 | rs974937   | 1.37 | 0.25 | 1.96E-01 | 0.22   | 0.63 | 0.42 | 3.21E-01 | 0.40 |
| 7 | 34074661 | rs12670628 | 0.94 | 0.23 | 7.83E-01 | 0.31   | 0.61 | 0.37 | 2.30E-01 | 0.47 |
| 7 | 34087546 | rs17169630 | 0.95 | 0.39 | 8.91E-01 | 0.08   | 0.78 | 0.43 | 6.00E-01 | 0.34 |
| 7 | 34088690 | rs17823423 | 0.86 | 0.26 | 5.51E-01 | 0.23   | 0.45 | 1.45 | 6.11E-01 | 0.04 |
| 7 | 34089823 | rs7806522  | 0.93 | 0.23 | 7.73E-01 | 0.30   | 0.57 | 0.39 | 1.88E-01 | 0.47 |
| 7 | 34090734 | rs13244436 | 0.96 | 0.25 | 8.66E-01 | 0.23   | 0.54 | 0.69 | 4.23E-01 | 0.09 |



|   |          |            |      |         |          |        |      |      |          |      |
|---|----------|------------|------|---------|----------|--------|------|------|----------|------|
| 7 | 34094687 | rs17169636 | 1.09 | 0.40    | 8.19E-01 | 0.07   | 1.14 | 0.51 | 8.17E-01 | 0.15 |
| 7 | 34103553 | rs1420328  | 0.75 | 0.40    | 4.71E-01 | 0.10   | 2.08 | 0.43 | 1.20E-01 | 0.22 |
| 7 | 34107393 | rs1362457  | 0.98 | 0.25    | 9.32E-01 | 0.22   | 0.58 | 0.63 | 4.31E-01 | 0.13 |
| 7 | 34111660 | rs961652   | 0.85 | 0.22    | 4.65E-01 | 0.48   | 1.18 | 0.41 | 7.19E-01 | 0.29 |
| 7 | 34117136 | rs759417   | 1.23 | 0.22    | 3.46E-01 | 0.29   | 1.51 | 0.36 | 3.01E-01 | 0.48 |
| 7 | 34121829 | rs2160308  | 1.14 | 0.23    | 5.65E-01 | 0.29   | 0.81 | 0.47 | 6.86E-01 | 0.17 |
| 7 | 34125622 | rs10249320 | 1.21 | 720.50  | 9.98E-01 | 0.01   |      |      | < 0.01   |      |
| 7 | 34126782 | rs7790026  | 1.23 | 0.22    | 3.45E-01 | 0.30   | 1.36 | 0.35 | 4.31E-01 | 0.49 |
| 7 | 34128156 | rs11973757 | 0.24 | 2052.01 | 9.99E-01 | < 0.01 | 7.18 | 0.73 | 4.26E-03 | 0.06 |
| 7 | 34132131 | rs1420331  | 1.09 | 0.24    | 7.32E-01 | 0.27   | 0.59 | 0.45 | 2.82E-01 | 0.28 |
| 7 | 34132727 | rs1420332  | 1.08 | 0.24    | 7.39E-01 | 0.27   | 1.38 | 0.39 | 4.51E-01 | 0.50 |
| 7 | 34133050 | rs973766   | 1.76 | 0.23    | 1.32E-02 | 0.31   | 0.17 | 1.48 | 2.71E-01 | 0.06 |
| 7 | 34133861 | rs10261012 | 1.09 | 0.24    | 7.29E-01 | 0.27   | 0.64 | 0.43 | 3.50E-01 | 0.32 |
| 7 | 34134582 | rs1420333  | 1.09 | 0.24    | 7.13E-01 | 0.27   | 1.11 | 0.39 | 8.11E-01 | 0.39 |
| 7 | 34135625 | rs12701343 | 1.09 | 0.26    | 7.26E-01 | 0.23   | 0.16 | 1.29 | 1.69E-01 | 0.08 |
| 7 | 34137529 | rs6948894  | 1.12 | 0.24    | 6.50E-01 | 0.27   | 0.62 | 0.44 | 3.31E-01 | 0.32 |
| 7 | 34137970 | rs12701344 | 1.25 | 729.85  | 9.98E-01 | < 0.01 | 2.67 | 0.86 | 2.89E-01 | 0.07 |
| 7 | 34138717 | rs1946146  | 1.03 | 0.25    | 8.93E-01 | 0.23   | 0.54 | 0.75 | 4.49E-01 | 0.11 |
| 7 | 34140513 | rs1420335  | 0.96 | 0.24    | 8.51E-01 | 0.31   | 1.27 | 0.40 | 5.95E-01 | 0.39 |

|   |          |            |      |         |          |        |      |      |          |      |
|---|----------|------------|------|---------|----------|--------|------|------|----------|------|
| 7 | 34140927 | rs6462526  | 0.96 | 0.24    | 8.72E-01 | 0.31   | 0.99 | 0.37 | 9.89E-01 | 0.47 |
| 7 | 34143378 | rs1420339  | 0.38 | 669.41  | 9.98E-01 | 0.00   | 1.12 | 0.81 | 9.02E-01 | 0.06 |
| 7 | 34147159 | rs10271544 | 1.06 | 0.21    | 7.81E-01 | 0.40   | 0.79 | 0.40 | 5.89E-01 | 0.40 |
| 7 | 34151057 | rs757640   | 1.27 | 0.25    | 3.37E-01 | 0.19   | 1.14 | 0.39 | 7.62E-01 | 0.34 |
| 7 | 34153768 | rs918038   | 1.08 | 0.21    | 7.03E-01 | 0.39   | 0.79 | 0.38 | 5.69E-01 | 0.44 |
| 7 | 34156746 | rs2080372  | 1.20 | 0.25    | 4.78E-01 | 0.19   | 0.81 | 0.50 | 7.00E-01 | 0.19 |
| 7 | 34157300 | rs17169653 | 2.64 | 1676.17 | 9.98E-01 | < 0.01 | 0.63 | 0.99 | 6.71E-01 | 0.07 |
| 7 | 34158292 | rs10236500 | 0.91 | 2466.61 | 9.98E-01 | < 0.01 | 3.89 | 0.75 | 6.04E-02 | 0.07 |
| 7 | 34159138 | rs1345347  | 1.19 | 0.25    | 4.85E-01 | 0.19   | 1.29 | 0.41 | 5.78E-01 | 0.27 |
| 7 | 34164659 | rs1014580  | 1.22 | 0.25    | 4.43E-01 | 0.19   | 1.34 | 0.41 | 5.23E-01 | 0.29 |
| 7 | 34164677 | rs1014581  | 1.08 | 0.21    | 7.12E-01 | 0.39   | 0.81 | 0.38 | 6.05E-01 | 0.45 |
| 7 | 34167361 | rs10486631 | 0.89 | 0.28    | 6.81E-01 | 0.19   | 0.26 | 0.89 | 1.45E-01 | 0.10 |
| 7 | 34168028 | rs6462533  | 1.05 | 0.21    | 8.28E-01 | 0.40   | 0.82 | 0.40 | 6.50E-01 | 0.43 |
| 7 | 34169964 | rs1861362  | 1.22 | 0.25    | 4.30E-01 | 0.19   | 0.47 | 0.57 | 2.32E-01 | 0.21 |
| 7 | 34173852 | rs10951406 | 1.15 | 0.25    | 5.94E-01 | 0.20   | 1.04 | 0.38 | 9.24E-01 | 0.46 |
| 7 | 34174173 | rs6961966  | 0.95 | 0.28    | 8.45E-01 | 0.20   | 0.43 | 0.65 | 2.35E-01 | 0.16 |
| 7 | 34178283 | rs12673452 | 0.03 | 5.32    | 3.96E-01 | 0.01   | 1.03 | 0.51 | 9.63E-01 | 0.12 |
| 7 | 34178645 | rs10486632 | 1.16 | 0.25    | 5.70E-01 | 0.20   | 0.62 | 0.41 | 2.96E-01 | 0.32 |
| 7 | 34191345 | rs1014578  | 1.03 | 0.21    | 8.79E-01 | 0.40   | 0.77 | 0.37 | 5.15E-01 | 0.42 |

|   |          |            |      |      |          |      |      |      |          |      |
|---|----------|------------|------|------|----------|------|------|------|----------|------|
| 7 | 34192011 | rs918037   | 1.13 | 0.21 | 5.75E-01 | 0.40 | 0.60 | 0.38 | 2.23E-01 | 0.41 |
| 7 | 34192762 | rs6968741  | 1.34 | 0.34 | 3.87E-01 | 0.06 | 1.22 | 0.36 | 6.24E-01 | 0.17 |
| 7 | 34193589 | rs11972404 | 1.85 | 0.61 | 3.02E-01 | 0.03 | 0.90 | 0.43 | 8.23E-01 | 0.23 |
| 7 | 34193952 | rs17169667 | 1.09 | 0.33 | 7.93E-01 | 0.11 | 1.64 | 0.40 | 2.63E-01 | 0.49 |
| 7 | 34194102 | rs2058681  | 1.24 | 0.22 | 3.30E-01 | 0.32 | 0.77 | 0.92 | 7.94E-01 | 0.06 |
