# Supplementary material for: Genetic Variants in the Bone Morphogenic Protein Gene Family Modify the Association between Residential Exposure to Traffic and Peripheral Arterial Disease
Source: PLOS journal article supplement (doi:10.1371/journal.pone.0152670), 2016-04-15
Supplement: S11 (10.1371/journal.pone.0152670.s011) [file journal.pone.0152670.s011.PDF › journal.pone.0152670.s011.PDF]

**S8 Table. Cis-eQTL associations for all genes associated with variants in BMP8A (EA GWIS P < 0.05).** This table gives the eQTL

associations for all genes associated with variants in BMP8A with an interaction P < 0.05 in the EA GWIS. Data on the eQTLs was taken from the GTEx Release V6[33].

| BMP8A eQTLs        |                              | rs3738676                       | rs2004330                       | rs1180343                        | rs1180341                        | rs755249                       | rs710913                      |
|--------------------|------------------------------|---------------------------------|---------------------------------|----------------------------------|----------------------------------|--------------------------------|-------------------------------|
|                    | Adipose - Subcutaneous       | 3.7x10 <sup>-6</sup><br>(0.37)  |                                 |                                  |                                  |                                | 1.7x10 <sup>-5</sup> (-0.33)  |
|                    | Artery - Tibial              |                                 |                                 |                                  | 5.3x10 <sup>-6</sup><br>(-0.36)  |                                |                               |
|                    | Brain - Cortex               |                                 |                                 |                                  | 3.7x10 <sup>-6</sup><br>(-0.44)  |                                |                               |
|                    | Esophagus - Muscularis       |                                 | 8.6x10 <sup>-6</sup><br>(-0.37) | 1x10 <sup>-5</sup><br>(-0.38)    | 2.3x10 <sup>-6</sup><br>(-0.4)   | 1.5x10 <sup>-5</sup><br>(0.44) | 5.5x10 <sup>-6</sup> (-0.38)  |
|                    | Heart - Atrial Appendage     |                                 | 1.3x10 <sup>-9</sup><br>(-0.52) | 1.2x10 <sup>-9</sup><br>(-0.54)  | 8.8x10 <sup>-10</sup><br>(-0.54) |                                |                               |
|                    | Heart - Left Ventricle       |                                 |                                 |                                  | 6.6x10 <sup>-6</sup><br>(-0.42)  |                                |                               |
|                    | Nerve - Tibial               | 1.2x10 <sup>-5</sup><br>(0.2)   | 5.5x10 <sup>-7</sup><br>(-0.25) | 1.3x10 <sup>-6</sup><br>(-0.24)  | 2.6x10 <sup>-6</sup><br>(-0.23)  | 3.6x10 <sup>-6</sup><br>(0.25) |                               |
|                    | Testis                       | 2.1x10 <sup>-12</sup><br>(0.54) | 6.9x10 <sup>-11</sup><br>(-0.5) | 2.2x10 <sup>-10</sup><br>(-0.48) | 2.3x10 <sup>-16</sup><br>(-0.61) | 2x10 <sup>-7</sup> (0.5)       | 9.5x10 <sup>-12</sup> (-0.52) |
| OXCT2 eQTLs        |                              | rs3738676                       | rs2004330                       | rs1180343                        | rs1180341                        | rs755249                       | rs710913                      |
|                    | Thyroid                      |                                 | 1.6x10 <sup>-6</sup> (0.3)      | 1.2x10 <sup>-6</sup> (0.31)      | 7.3x10 <sup>-6</sup> (0.29)      |                                |                               |
| RP11-69E11.4 eQTLs |                              | rs3738676                       | rs2004330                       | rs1180343                        | rs1180341                        | rs755249                       | rs710913                      |
|                    | Adipose - Subcutaneous       | 1.1x10 <sup>-9</sup><br>(0.41)  | 6.7x10 <sup>-6</sup><br>(-0.32) | 1.5x10 <sup>-6</sup><br>(-0.34)  | 3.1x10 <sup>-11</sup><br>(-0.44) | 8.4x10 <sup>-9</sup><br>(0.46) | 1.2x10 <sup>-7</sup> (-0.34)  |
|                    | Adipose - Visceral (Omentum) | 3.2x10 <sup>-8</sup><br>(0.46)  |                                 |                                  | 1.4x10 <sup>-7</sup><br>(-0.42)  |                                | 1.3x10 <sup>-6</sup> (-0.4)   |
|                    | Artery - Aorta               | 1.6x10 <sup>-8</sup><br>(0.41)  |                                 | 9.5x10 <sup>-6</sup><br>(-0.32)  | 2x10 <sup>-6</sup> (-0.33)       | 9.9x10 <sup>-8</sup><br>(0.41) | 3.4x10 <sup>-7</sup> (-0.35)  |

|                                       |                                 |                                  |                                  |                                  |                                 |                               |
|---------------------------------------|---------------------------------|----------------------------------|----------------------------------|----------------------------------|---------------------------------|-------------------------------|
| Artery - Tibial                       | $6.5 \times 10^{-16}$<br>(0.46) | $1.8 \times 10^{-7}$<br>(-0.29)  | $1.1 \times 10^{-7}$ (-0.3)      | $4.8 \times 10^{-13}$<br>(-0.42) | $1.1 \times 10^{-10}$<br>(0.44) | $1.5 \times 10^{-11}$ (-0.39) |
| Brain - Cerebellar Hemisphere         | $7.4 \times 10^{-6}$<br>(0.4)   |                                  |                                  |                                  |                                 |                               |
| Brain - Frontal Cortex (BA9)          | $3.6 \times 10^{-6}$<br>(0.41)  |                                  |                                  |                                  |                                 |                               |
| Breast - Mammary Tissue               | $3.1 \times 10^{-8}$<br>(0.44)  |                                  |                                  | $3.9 \times 10^{-8}$<br>(-0.42)  |                                 | $7.6 \times 10^{-7}$ (-0.38)  |
| Cells - Transformed fibroblasts       | $4.3 \times 10^{-13}$<br>(0.44) | $9.2 \times 10^{-9}$<br>(-0.34)  | $1.1 \times 10^{-8}$<br>(-0.34)  | $7.6 \times 10^{-13}$<br>(-0.41) | $2 \times 10^{-8}$ (0.4)        | $8.6 \times 10^{-10}$ (-0.36) |
| Colon - Sigmoid                       |                                 |                                  |                                  | $2.2 \times 10^{-7}$<br>(-0.37)  |                                 |                               |
| Colon - Transverse                    | $1.7 \times 10^{-8}$<br>(0.44)  |                                  |                                  | $2.4 \times 10^{-6}$<br>(-0.36)  | $1.3 \times 10^{-8}$<br>(0.56)  | $9.4 \times 10^{-7}$ (-0.39)  |
| Esophagus - Gastroesophageal Junction | $2.1 \times 10^{-8}$<br>(0.4)   | $1.1 \times 10^{-6}$<br>(-0.33)  | $6.2 \times 10^{-8}$<br>(-0.36)  | $2.2 \times 10^{-12}$<br>(-0.45) |                                 | $5 \times 10^{-9}$ (-0.39)    |
| Esophagus - Mucosa                    | $3.3 \times 10^{-9}$<br>(0.31)  |                                  |                                  | $5.5 \times 10^{-7}$<br>(-0.27)  | $1.1 \times 10^{-7}$<br>(0.32)  | $6.1 \times 10^{-9}$ (-0.29)  |
| Esophagus - Muscularis                | $9.7 \times 10^{-13}$<br>(0.41) | $5.5 \times 10^{-11}$<br>(-0.37) | $1.4 \times 10^{-11}$<br>(-0.39) | $4.6 \times 10^{-16}$<br>(-0.45) | $4.3 \times 10^{-10}$<br>(0.43) | $1.7 \times 10^{-12}$ (-0.4)  |
| Heart - Atrial Appendage              |                                 | $9.4 \times 10^{-8}$<br>(-0.36)  | $3.5 \times 10^{-8}$<br>(-0.39)  | $3.2 \times 10^{-7}$<br>(-0.36)  |                                 | $2.5 \times 10^{-6}$ (-0.35)  |
| Heart - Left Ventricle                | $1.1 \times 10^{-7}$<br>(0.31)  |                                  |                                  | $6.8 \times 10^{-9}$<br>(-0.34)  |                                 | $1.5 \times 10^{-8}$ (-0.33)  |
| Lung                                  | $1.9 \times 10^{-9}$<br>(0.37)  |                                  |                                  | $1.2 \times 10^{-6}$<br>(-0.31)  | $3.3 \times 10^{-8}$<br>(0.4)   | $2.9 \times 10^{-9}$ (-0.36)  |
| Nerve - Tibial                        | $1.7 \times 10^{-11}$<br>(0.41) | $1 \times 10^{-7}$ (-0.35)       | $1.9 \times 10^{-8}$<br>(-0.37)  | $3.6 \times 10^{-11}$<br>(-0.41) | $1.6 \times 10^{-11}$<br>(0.47) | $3.7 \times 10^{-10}$ (-0.37) |
| Pancreas                              | $6.2 \times 10^{-6}$<br>(0.32)  |                                  |                                  |                                  |                                 |                               |
| Skin - Not Sun Exposed (Suprapubic)   | $1.2 \times 10^{-6}$<br>(0.34)  |                                  |                                  | $3.9 \times 10^{-8}$<br>(-0.37)  |                                 |                               |
| Skin - Sun Exposed (Lower leg)        | $1.1 \times 10^{-13}$<br>(0.43) |                                  |                                  | $2.1 \times 10^{-10}$<br>(-0.36) | $1.1 \times 10^{-8}$<br>(0.39)  | $1 \times 10^{-9}$ (-0.34)    |

|               |                                     |                                 |                                 |                                 |                                 |                                  |                              |
|---------------|-------------------------------------|---------------------------------|---------------------------------|---------------------------------|---------------------------------|----------------------------------|------------------------------|
|               | Spleen                              | $3.6 \times 10^{-7}$<br>(0.58)  |                                 |                                 | $5.7 \times 10^{-6}$<br>(-0.48) |                                  | $7.4 \times 10^{-8}$ (-0.57) |
|               | Stomach                             | $4.7 \times 10^{-11}$<br>(0.51) |                                 |                                 | $3.9 \times 10^{-7}$<br>(-0.41) | $1.5 \times 10^{-8}$<br>(0.55)   | $2.3 \times 10^{-7}$ (-0.42) |
|               | Thyroid                             | $6.8 \times 10^{-8}$<br>(0.28)  |                                 |                                 |                                 | $2.2 \times 10^{-6}$<br>(0.3)    | $8.5 \times 10^{-8}$ (-0.28) |
|               | Whole Blood                         | $1.1 \times 10^{-8}$<br>(0.27)  |                                 |                                 |                                 | $8.6 \times 10^{-8}$<br>(0.29)   | $1 \times 10^{-6}$ (-0.23)   |
| PABPC4 eQTLs  |                                     | rs3738676                       | rs2004330                       | rs1180343                       | rs1180341                       | rs755249                         | rs710913                     |
|               | Adipose - Subcutaneous              |                                 |                                 |                                 |                                 | $3 \times 10^{-8}$<br>(-0.28)    |                              |
|               | Adipose - Visceral (Omentum)        |                                 |                                 |                                 |                                 | $5.5 \times 10^{-6}$<br>(-0.25)  |                              |
|               | Artery - Tibial                     | $4.5 \times 10^{-6}$<br>(-0.2)  |                                 |                                 |                                 | $6.4 \times 10^{-12}$<br>(-0.35) |                              |
|               | Breast - Mammary Tissue             |                                 |                                 |                                 |                                 | $6 \times 10^{-7}$<br>(-0.32)    |                              |
|               | Cells - Transformed fibroblasts     |                                 |                                 |                                 |                                 | $5.8 \times 10^{-9}$<br>(-0.23)  |                              |
|               | Esophagus - Mucosa                  | $5.5 \times 10^{-6}$<br>(-0.24) |                                 |                                 |                                 | $2.1 \times 10^{-7}$<br>(-0.3)   |                              |
|               | Lung                                | $2.9 \times 10^{-6}$<br>(-0.2)  |                                 |                                 |                                 | $8.5 \times 10^{-6}$<br>(-0.23)  | $5 \times 10^{-6}$ (0.19)    |
|               | Nerve - Tibial                      | $6.4 \times 10^{-6}$<br>(-0.18) |                                 |                                 | $8.5 \times 10^{-7}$ (0.2)      | $8.2 \times 10^{-10}$<br>(-0.27) | $2.5 \times 10^{-9}$ (0.22)  |
|               | Skin - Not Sun Exposed (Suprapubic) |                                 |                                 |                                 |                                 | $1.7 \times 10^{-7}$<br>(-0.29)  |                              |
|               | Skin - Sun Exposed (Lower leg)      |                                 |                                 |                                 |                                 | $1.3 \times 10^{-9}$<br>(-0.27)  | $8.4 \times 10^{-6}$ (0.17)  |
|               | Thyroid                             | $1.0 \times 10^{-5}$<br>(-0.23) |                                 |                                 |                                 |                                  |                              |
| OXCT2P1 eQTLs |                                     | rs3738676                       | rs2004330                       | rs1180343                       | rs1180341                       | rs755249                         | rs710913                     |
|               | Adipose - Subcutaneous              |                                 | $6.4 \times 10^{-6}$<br>(-0.33) | $8.7 \times 10^{-6}$<br>(-0.33) | $5.1 \times 10^{-7}$<br>(-0.35) | $2.3 \times 10^{-8}$<br>(0.46)   | $3.6 \times 10^{-6}$ (-0.31) |

|  |                                             |  |                                  |                                  |                                  |                                 |                               |
|--|---------------------------------------------|--|----------------------------------|----------------------------------|----------------------------------|---------------------------------|-------------------------------|
|  | Adipose -<br>Visceral<br>(Omentum)          |  |                                  |                                  | $3 \times 10^{-6}$ (-0.44)       | $1.5 \times 10^{-9}$<br>(0.69)  |                               |
|  | Artery - Aorta                              |  | $1.1 \times 10^{-6}$<br>(-0.51)  | $3.0 \times 10^{-6}$<br>(-0.49)  | $5.0 \times 10^{-6}$<br>(-0.47)  | $7.7 \times 10^{-10}$<br>(0.69) |                               |
|  | Artery - Tibial                             |  | $3.8 \times 10^{-9}$ (-<br>0.4)  | $7.1 \times 10^{-9}$ (-0.4)      | $5 \times 10^{-10}$ (-0.45)      | $2.4 \times 10^{-15}$<br>(0.65) | $1.9 \times 10^{-10}$ (-0.46) |
|  | Breast -<br>Mammary Tissue                  |  |                                  |                                  |                                  | $1.4 \times 10^{-7}$ (0.55)     |                               |
|  | Cells -<br>Transformed<br>fibroblasts       |  | $4.3 \times 10^{-6}$<br>(-0.34)  | $1.4 \times 10^{-5}$<br>(-0.33)  |                                  | $2.6 \times 10^{-11}$<br>(0.59) | $1.8 \times 10^{-8}$ (-0.41)  |
|  | Colon - Sigmoid                             |  |                                  | $6.5 \times 10^{-6}$<br>(-0.52)  | $8.9 \times 10^{-7}$<br>(-0.53)  |                                 |                               |
|  | Colon -<br>Transverse                       |  |                                  | $6.1 \times 10^{-6}$<br>(-0.46)  | $3.6 \times 10^{-6}$<br>(-0.48)  |                                 |                               |
|  | Esophagus -<br>Gastroesophageal<br>Junction |  |                                  |                                  | $9.7 \times 10^{-7}$<br>(-0.57)  | $3 \times 10^{-6}$<br>(0.71)    |                               |
|  | Esophagus -<br>Muscularis                   |  | $1.4 \times 10^{-9}$<br>(-0.5)   | $8.7 \times 10^{-10}$<br>(-0.51) | $2.7 \times 10^{-10}$<br>(-0.53) | $6.5 \times 10^{-9}$<br>(0.58)  | $2.5 \times 10^{-7}$ (-0.43)  |
|  | Heart - Atrial<br>Appendage                 |  | $1.1 \times 10^{-10}$<br>(-0.52) | $4.5 \times 10^{-10}$<br>(-0.53) | $1.3 \times 10^{-9}$<br>(-0.51)  |                                 | $3.1 \times 10^{-6}$ (-0.43)  |
|  | Lung                                        |  | $6.6 \times 10^{-6}$<br>(-0.36)  | $8.9 \times 10^{-6}$<br>(-0.36)  | $1.6 \times 10^{-6}$<br>(-0.37)  | $1.7 \times 10^{-9}$<br>(0.54)  | $8.1 \times 10^{-6}$ (-0.33)  |
|  | Nerve - Tibial                              |  | $1.3 \times 10^{-7}$<br>(-0.41)  | $1.5 \times 10^{-9}$<br>(-0.47)  | $1.2 \times 10^{-7}$ (-0.4)      | $1.8 \times 10^{-7}$<br>(0.44)  |                               |
|  | Spleen                                      |  | $2.4 \times 10^{-6}$<br>(-0.68)  | $1.1 \times 10^{-6}$ (-0.7)      | $2.8 \times 10^{-8}$<br>(-0.75)  |                                 |                               |
|  | Thyroid                                     |  | $1.7 \times 10^{-7}$<br>(-0.27)  | $3 \times 10^{-8}$ (-0.28)       | $1.3 \times 10^{-9}$<br>(-0.31)  | $1.8 \times 10^{-6}$<br>(0.3)   |                               |
